# Supplementary material
Source: PubMed Central journal article supplement (PMC6551276)
Supplement: NIHMS1526897-supplement-2.pdf [file NIHMS1526897-supplement-2.pdf]

**Supplementary Table 1. Unpaired two tailed Student's t-test p-values, t-values, and degrees of freedom for product purity comparisons. (a)** Unpaired two tailed Student's t-test p-values, t-values, and degrees of freedom (df) comparing CBEmax and CP-CBEmax variants at two genomic sites prone to non-C-to-T byproduct formation. **(b)** Unpaired two tailed Student's t-test p-values, t-values, and degrees of freedom (df) comparing CBEmax-B and CP-CBEmax-B variants at two genomic sites prone to non-C-to-T byproduct formation. Values and error bars reflect the mean±s.d. of three biological replicates performed on different days at each site. ns, P>0.05; \*P<0.05; \*\*P<0.01; \*\*\*P<0.001

**a**

|                          | Site 28 (C7) |         |    |              |                          | Site 30 (C6) |         |    |              |  |
|--------------------------|--------------|---------|----|--------------|--------------------------|--------------|---------|----|--------------|--|
|                          | p-value      | t value | df | significance |                          | p-value      | t value | df | significance |  |
| CBEmax vs. CP1012-CBEmax | 0.0041       | 5.9     | 4  | **           | CBEmax vs. CP1012-CBEmax | 0.023        | 3.6     | 4  | *            |  |
| CBEmax vs. CP1028-CBEmax | 0.0029       | 6.5     | 4  | **           | CBEmax vs. CP1028-CBEmax | 0.0010       | 8.5     | 4  | **           |  |
| CBEmax vs. CP1041-CBEmax | 0.0016       | 7.7     | 4  | **           | CBEmax vs. CP1041-CBEmax | 0.00046      | 11      | 4  | ***          |  |
| CBEmax vs. CP1249-CBEmax | 0.0050       | 5.6     | 4  | **           | CBEmax vs. CP1249-CBEmax | 0.0064       | 5.2     | 4  | **           |  |

**b**

|                              | Site 28 (C7) |         |    |              |                              | Site 30 (C6) |         |    |              |  |
|------------------------------|--------------|---------|----|--------------|------------------------------|--------------|---------|----|--------------|--|
|                              | p-value      | t value | df | significance |                              | p-value      | t value | df | significance |  |
| CBEmax-B vs. CP1012-CBEmax-B | 0.00074      | 9.3     | 4  | ***          | CBEmax-B vs. CP1012-CBEmax-B | 0.21         | 1.5     | 4  | ns           |  |
| CBEmax-B vs. CP1028-CBEmax-B | 8.8E-05      | 16      | 4  | ***          | CBEmax-B vs. CP1028-CBEmax-B | 0.00082      | 9.1     | 4  | ***          |  |
| CBEmax-B vs. CP1041-CBEmax-B | 0.0034       | 6.2     | 4  | **           | CBEmax-B vs. CP1041-CBEmax-B | 2.3E-06      | 40      | 4  | ***          |  |
| CBEmax-B vs. CP1249-CBEmax-B | 0.014        | 4.2     | 4  | *            | CBEmax-B vs. CP1249-CBEmax-B | 0.00016      | 14      | 4  | ***          |  |

**Supplementary Table 2.** Activities of CP-CBEmax variants versus CBEmax at the HEK2 on-target and off-target sites previously characterized for *S. pyogenes* Cas9 nuclease.

|                       |  | % of total sequencing reads with C•G converted to T•A |   |   |      |   |      |   |   |   |      |    |    |    |    |    |    |     |    |     |     |        |
|-----------------------|--|-------------------------------------------------------|---|---|------|---|------|---|---|---|------|----|----|----|----|----|----|-----|----|-----|-----|--------|
| Position              |  | 1                                                     | 2 | 3 | 4    | 5 | 6    | 7 | 8 | 9 | 10   | 11 | 12 | 13 | 14 | 15 | 16 | 17  | 18 | 19  | 20  |        |
| <b>HEK2 on-target</b> |  | G                                                     | A | A | C    | A | C    | A | A | A | G    | C  | A  | T  | A  | G  | A  | C   | T  | G   | C   | Indel% |
| CBEmax                |  |                                                       |   |   | 58.6 |   | 59.9 |   |   |   | 0.2  |    |    |    |    |    |    | 0.1 |    | 0.1 | 0.9 |        |
| CP1012-CBEmax         |  |                                                       |   |   | 21.6 |   | 53.0 |   |   |   | 2.9  |    |    |    |    |    |    | 0.4 |    | 0.1 | 0.4 |        |
| CP1028-CBEmax         |  |                                                       |   |   | 32.7 |   | 63.1 |   |   |   | 15.5 |    |    |    |    |    |    | 1.1 |    | 0.1 | 0.5 |        |
| CP1041-CBEmax         |  |                                                       |   |   | 12.9 |   | 20.1 |   |   |   | 0.6  |    |    |    |    |    |    | 0.3 |    | 0.1 | 0.1 |        |
| CP1249-CBEmax         |  |                                                       |   |   | 14.5 |   | 60.7 |   |   |   | 3.9  |    |    |    |    |    |    | 0.4 |    | 0.0 | 0.6 |        |
| CP1300-CBEmax         |  |                                                       |   |   | 0.5  |   | 16.4 |   |   |   | 0.6  |    |    |    |    |    |    | 0.1 |    | 0.0 | 0.1 |        |

|                               |  | % of total sequencing reads with C•G converted to T•A |   |   |     |   |     |   |   |   |     |    |    |    |    |    |    |    |    |     |     |        |
|-------------------------------|--|-------------------------------------------------------|---|---|-----|---|-----|---|---|---|-----|----|----|----|----|----|----|----|----|-----|-----|--------|
| Position                      |  | 1                                                     | 2 | 3 | 4   | 5 | 6   | 7 | 8 | 9 | 10  | 11 | 12 | 13 | 14 | 15 | 16 | 17 | 18 | 19  | 20  |        |
| <b>HEK2 off-target site 1</b> |  | G                                                     | A | A | C   | A | C   | A | A | T | G   | C  | A  | T  | A  | G  | A  | T  | T  | G   | C   | Indel% |
| CBEmax                        |  |                                                       |   |   | 0.2 |   | 0.8 |   |   |   | 0.0 |    |    |    |    |    |    |    |    | 0.1 | 0.0 |        |
| CP1012-CBEmax                 |  |                                                       |   |   | 0.1 |   | 0.2 |   |   |   | 0.1 |    |    |    |    |    |    |    |    | 0.1 | 0.0 |        |
| CP1028-CBEmax                 |  |                                                       |   |   | 0.0 |   | 0.0 |   |   |   | 0.1 |    |    |    |    |    |    |    |    | 0.1 | 0.0 |        |
| CP1041-CBEmax                 |  |                                                       |   |   | 0.1 |   | 0.1 |   |   |   | 0.0 |    |    |    |    |    |    |    |    | 0.1 | 0.0 |        |
| CP1249-CBEmax                 |  |                                                       |   |   | 0.0 |   | 0.0 |   |   |   | 0.0 |    |    |    |    |    |    |    |    | 0.1 | 0.0 |        |
| CP1300-CBEmax                 |  |                                                       |   |   | 0.0 |   | 0.0 |   |   |   | 0.0 |    |    |    |    |    |    |    |    | 0.1 | 0.0 |        |

|                               |  | % of total sequencing reads with C•G converted to T•A |   |   |     |   |   |   |   |   |     |    |    |    |    |    |    |     |    |     |     |        |
|-------------------------------|--|-------------------------------------------------------|---|---|-----|---|---|---|---|---|-----|----|----|----|----|----|----|-----|----|-----|-----|--------|
| Position                      |  | 1                                                     | 2 | 3 | 4   | 5 | 6 | 7 | 8 | 9 | 10  | 11 | 12 | 13 | 14 | 15 | 16 | 17  | 18 | 19  | 20  |        |
| <b>HEK2 off-target site 2</b> |  | A                                                     | A | A | C   | A | T | A | A | A | G   | C  | A  | T  | A  | G  | A  | C   | T  | G   | C   | Indel% |
| CBEmax                        |  |                                                       |   |   | 0.0 |   |   |   |   |   | 0.0 |    |    |    |    |    |    | 0.0 |    | 0.0 | 0.0 |        |
| CP1012-CBEmax                 |  |                                                       |   |   | 0.0 |   |   |   |   |   | 0.0 |    |    |    |    |    |    | 0.0 |    | 0.0 | 0.0 |        |
| CP1028-CBEmax                 |  |                                                       |   |   | 0.0 |   |   |   |   |   | 0.0 |    |    |    |    |    |    | 0.0 |    | 0.0 | 0.0 |        |
| CP1041-CBEmax                 |  |                                                       |   |   | 0.0 |   |   |   |   |   | 0.0 |    |    |    |    |    |    | 0.0 |    | 0.0 | 0.0 |        |
| CP1249-CBEmax                 |  |                                                       |   |   | 0.0 |   |   |   |   |   | 0.0 |    |    |    |    |    |    | 0.0 |    | 0.0 | 0.0 |        |
| CP1300-CBEmax                 |  |                                                       |   |   | 0.0 |   |   |   |   |   | 0.0 |    |    |    |    |    |    | 0.0 |    | 0.0 | 0.0 |        |

**Supplementary Table 3.** Activities of CP-ABEmax variants versus ABEmax at the HEK2 on-target and off-target sites previously characterized for *S. pyogenes* Cas9 nuclease.

| Position              | % of total sequencing reads with A•T converted to G•C |     |     |   |      |   |      |     |      |    |    |      |    |      |    |     |    |    |    |    | Indel% |
|-----------------------|-------------------------------------------------------|-----|-----|---|------|---|------|-----|------|----|----|------|----|------|----|-----|----|----|----|----|--------|
|                       | 1                                                     | 2   | 3   | 4 | 5    | 6 | 7    | 8   | 9    | 10 | 11 | 12   | 13 | 14   | 15 | 16  | 17 | 18 | 19 | 20 |        |
| <b>HEK2 on-target</b> | G                                                     | A   | A   | C | A    | C | A    | A   | A    | G  | C  | A    | T  | A    | G  | A   | C  | T  | G  | C  |        |
| ABEmax                |                                                       | 0.1 | 0.8 |   | 78.0 |   | 27.3 | 1.0 | 1.0  |    |    | 0.1  |    | 0.0  |    | 0.0 |    |    |    |    | 0.9    |
| CP1012-ABEmax         |                                                       | 0.5 | 1.9 |   | 45.3 |   | 27.8 | 7.3 | 7.8  |    |    | 3.4  |    | 1.9  |    | 0.0 |    |    |    |    | 0.7    |
| CP1028-ABEmax         |                                                       | 0.1 | 1.1 |   | 80.6 |   | 8.5  | 3.1 | 4.7  |    |    | 6.3  |    | 1.6  |    | 0.0 |    |    |    |    | 0.6    |
| CP1041-ABEmax         |                                                       | 0.5 | 4.0 |   | 56.8 |   | 21.6 | 3.9 | 7.5  |    |    | 17.9 |    | 17.8 |    | 0.2 |    |    |    |    | 0.4    |
| CP1249-ABEmax         |                                                       | 0.0 | 0.8 |   | 84.9 |   | 33.0 | 7.5 | 12.4 |    |    | 2.7  |    | 2.0  |    | 0.0 |    |    |    |    | 0.4    |
| CP1300-ABEmax         |                                                       | 0.0 | 0.1 |   | 59.2 |   | 3.5  | 1.3 | 1.8  |    |    | 0.3  |    | 0.1  |    | 0.0 |    |    |    |    | 0.1    |

| Position                      | % of total sequencing reads with A•T converted to G•C |     |     |   |     |   |     |     |   |    |    |     |    |     |    |     |    |    |    |    | Indel% |
|-------------------------------|-------------------------------------------------------|-----|-----|---|-----|---|-----|-----|---|----|----|-----|----|-----|----|-----|----|----|----|----|--------|
|                               | 1                                                     | 2   | 3   | 4 | 5   | 6 | 7   | 8   | 9 | 10 | 11 | 12  | 13 | 14  | 15 | 16  | 17 | 18 | 19 | 20 |        |
| <b>HEK2 off-target site 1</b> | G                                                     | A   | A   | C | A   | C | A   | A   | T | G  | C  | A   | T  | A   | G  | A   | T  | T  | G  | C  |        |
| ABEmax                        |                                                       | 0.0 | 0.0 |   | 1.7 |   | 0.1 | 0.1 |   |    |    | 0.0 |    | 0.0 |    | 0.0 |    |    |    |    | 0.1    |
| CP1012-ABEmax                 |                                                       | 0.0 | 0.0 |   | 0.1 |   | 0.0 | 0.0 |   |    |    | 0.0 |    | 0.0 |    | 0.0 |    |    |    |    | 0.0    |
| CP1028-ABEmax                 |                                                       | 0.0 | 0.0 |   | 0.5 |   | 0.1 | 0.0 |   |    |    | 0.0 |    | 0.1 |    | 0.0 |    |    |    |    | 0.0    |
| CP1041-ABEmax                 |                                                       | 0.0 | 0.0 |   | 0.0 |   | 0.0 | 0.0 |   |    |    | 0.0 |    | 0.0 |    | 0.0 |    |    |    |    | 0.0    |
| CP1249-ABEmax                 |                                                       | 0.0 | 0.0 |   | 0.1 |   | 0.1 | 0.1 |   |    |    | 0.0 |    | 0.1 |    | 0.0 |    |    |    |    | 0.0    |
| CP1300-ABEmax                 |                                                       | 0.0 | 0.0 |   | 0.0 |   | 0.0 | 0.0 |   |    |    | 0.0 |    | 0.0 |    | 0.0 |    |    |    |    | 0.0    |

| Position                      | % of total sequencing reads with A•T converted to G•C |     |     |     |     |   |     |     |     |    |    |     |    |     |    |     |    |    |    |    | Indel% |
|-------------------------------|-------------------------------------------------------|-----|-----|-----|-----|---|-----|-----|-----|----|----|-----|----|-----|----|-----|----|----|----|----|--------|
|                               | 1                                                     | 2   | 3   | 4   | 5   | 6 | 7   | 8   | 9   | 10 | 11 | 12  | 13 | 14  | 15 | 16  | 17 | 18 | 19 | 20 |        |
| <b>HEK2 off-target site 2</b> | A                                                     | A   | A   | C   | A   | T | A   | A   | A   | G  | C  | A   | T  | A   | G  | A   | C  | T  | G  | C  |        |
| ABEmax                        |                                                       | 0.0 | 0.0 | 0.0 | 0.0 |   | 0.0 | 0.0 | 0.0 |    |    | 0.0 |    | 0.0 |    | 0.0 |    |    |    |    | 0.0    |
| CP1012-ABEmax                 |                                                       | 0.0 | 0.0 | 0.0 | 0.0 |   | 0.0 | 0.0 | 0.0 |    |    | 0.0 |    | 0.0 |    | 0.0 |    |    |    |    | 0.0    |
| CP1028-ABEmax                 |                                                       | 0.0 | 0.0 | 0.0 | 0.0 |   | 0.0 | 0.0 | 0.0 |    |    | 0.0 |    | 0.0 |    | 0.0 |    |    |    |    | 0.0    |
| CP1041-ABEmax                 |                                                       | 0.0 | 0.0 | 0.0 | 0.0 |   | 0.0 | 0.0 | 0.0 |    |    | 0.0 |    | 0.0 |    | 0.0 |    |    |    |    | 0.0    |
| CP1249-ABEmax                 |                                                       | 0.0 | 0.0 | 0.0 | 0.0 |   | 0.0 | 0.0 | 0.0 |    |    | 0.0 |    | 0.0 |    | 0.0 |    |    |    |    | 0.0    |
| CP1300-ABEmax                 |                                                       | 0.0 | 0.0 | 0.0 | 0.0 |   | 0.0 | 0.0 | 0.0 |    |    | 0.0 |    | 0.0 |    | 0.0 |    |    |    |    | 0.0    |



**Supplementary Table 5.** Activities of CP-ABEmax variants versus ABEmax at the EMX1 on-target and off-target sites previously characterized for *S. pyogenes* Cas9 nuclease.

| Position             | % of total sequencing reads with A•T converted to G•C |     |   |   |   |     |   |      |   |    |      |     |     |    |     |     |    |     |     |     | Indel% |
|----------------------|-------------------------------------------------------|-----|---|---|---|-----|---|------|---|----|------|-----|-----|----|-----|-----|----|-----|-----|-----|--------|
|                      | 1                                                     | 2   | 3 | 4 | 5 | 6   | 7 | 8    | 9 | 10 | 11   | 12  | 13  | 14 | 15  | 16  | 17 | 18  | 19  | 20  |        |
| <b>EMX on-target</b> | G                                                     | A   | G | T | C | C   | G | A    | G | C  | A    | G   | A   | A  | G   | A   | A  | G   | A   | A   |        |
| ABEmax               |                                                       | 2.5 |   |   |   | 0.0 |   | 2.2  |   |    | 1.0  | 0.2 | 0.1 |    | 1.1 | 0.3 |    | 0.1 | 0.2 | 7.0 |        |
| CP1012-ABEmax        |                                                       | 4.1 |   |   |   | 0.0 |   | 23.1 |   |    | 22.4 | 0.7 | 0.4 |    | 1.2 | 0.4 |    | 0.2 | 0.3 | 1.0 |        |
| CP1028-ABEmax        |                                                       | 3.0 |   |   |   | 0.0 |   | 7.1  |   |    | 15.7 | 0.6 | 0.4 |    | 1.3 | 0.4 |    | 0.2 | 0.3 | 2.8 |        |
| CP1041-ABEmax        |                                                       | 7.2 |   |   |   | 0.0 |   | 15.7 |   |    | 24.4 | 2.7 | 2.2 |    | 1.3 | 0.4 |    | 0.2 | 0.3 | 0.7 |        |
| CP1249-ABEmax        |                                                       | 2.7 |   |   |   | 0.0 |   | 23.8 |   |    | 11.2 | 0.5 | 0.4 |    | 1.1 | 0.5 |    | 0.2 | 0.3 | 4.0 |        |
| CP1300-ABEmax        |                                                       | 2.5 |   |   |   | 0.0 |   | 3.4  |   |    | 1.5  | 0.2 | 0.1 |    | 1.1 | 0.4 |    | 0.1 | 0.3 | 0.2 |        |

| Position                     | % of total sequencing reads with A•T converted to G•C |     |   |   |   |      |   |     |   |    |      |     |     |    |     |     |    |     |     |     | Indel% |
|------------------------------|-------------------------------------------------------|-----|---|---|---|------|---|-----|---|----|------|-----|-----|----|-----|-----|----|-----|-----|-----|--------|
|                              | 1                                                     | 2   | 3 | 4 | 5 | 6    | 7 | 8   | 9 | 10 | 11   | 12  | 13  | 14 | 15  | 16  | 17 | 18  | 19  | 20  |        |
| <b>EMX off-target site 1</b> | G                                                     | A   | G | T | T | A    | G | A   | G | C  | A    | G   | A   | A  | G   | A   | A  | G   | A   | A   |        |
| ABEmax                       |                                                       | 0.2 |   |   |   | 19.5 |   | 0.9 |   |    | 0.1  | 0.0 | 0.0 |    | 0.0 | 0.0 |    | 0.0 | 0.0 | 0.0 |        |
| CP1012-ABEmax                |                                                       | 0.2 |   |   |   | 3.9  |   | 2.0 |   |    | 2.6  | 0.2 | 0.1 |    | 0.0 | 0.0 |    | 0.0 | 0.0 | 0.0 |        |
| CP1028-ABEmax                |                                                       | 0.8 |   |   |   | 14.9 |   | 4.4 |   |    | 12.7 | 0.5 | 0.4 |    | 0.0 | 0.0 |    | 0.0 | 0.0 | 0.2 |        |
| CP1041-ABEmax                |                                                       | 0.2 |   |   |   | 2.0  |   | 2.5 |   |    | 3.8  | 3.2 | 5.0 |    | 0.1 | 0.0 |    | 0.0 | 0.0 | 0.0 |        |
| CP1249-ABEmax                |                                                       | 0.1 |   |   |   | 11.6 |   | 2.7 |   |    | 2.4  | 0.5 | 0.6 |    | 0.0 | 0.0 |    | 0.0 | 0.0 | 0.0 |        |
| CP1300-ABEmax                |                                                       | 0.0 |   |   |   | 0.5  |   | 0.2 |   |    | 0.2  | 0.0 | 0.1 |    | 0.0 | 0.0 |    | 0.0 | 0.0 | 0.0 |        |

| Position                     | % of total sequencing reads with A•T converted to G•C |     |   |   |   |   |     |     |   |    |     |     |     |    |     |     |    |     |     |     | Indel% |
|------------------------------|-------------------------------------------------------|-----|---|---|---|---|-----|-----|---|----|-----|-----|-----|----|-----|-----|----|-----|-----|-----|--------|
|                              | 1                                                     | 2   | 3 | 4 | 5 | 6 | 7   | 8   | 9 | 10 | 11  | 12  | 13  | 14 | 15  | 16  | 17 | 18  | 19  | 20  |        |
| <b>EMX off-target site 2</b> | G                                                     | A   | G | T | C | T | A   | A   | G | C  | A   | G   | A   | A  | G   | A   | A  | G   | A   | A   |        |
| ABEmax                       |                                                       | 0.1 |   |   |   |   | 1.1 | 0.1 |   |    | 0.0 | 0.0 | 0.0 |    | 0.0 | 0.0 |    | 0.0 | 0.0 | 0.1 |        |
| CP1012-ABEmax                |                                                       | 0.1 |   |   |   |   | 0.1 | 0.1 |   |    | 0.1 | 0.0 | 0.0 |    | 0.0 | 0.0 |    | 0.0 | 0.0 | 0.0 |        |
| CP1028-ABEmax                |                                                       | 0.2 |   |   |   |   | 0.8 | 0.4 |   |    | 1.9 | 0.1 | 0.1 |    | 0.0 | 0.0 |    | 0.0 | 0.0 | 0.0 |        |
| CP1041-ABEmax                |                                                       | 0.0 |   |   |   |   | 0.1 | 0.0 |   |    | 0.0 | 0.0 | 0.0 |    | 0.0 | 0.0 |    | 0.0 | 0.0 | 0.0 |        |
| CP1249-ABEmax                |                                                       | 0.0 |   |   |   |   | 1.3 | 1.1 |   |    | 0.6 | 0.1 | 0.1 |    | 0.0 | 0.0 |    | 0.0 | 0.0 | 0.0 |        |
| CP1300-ABEmax                |                                                       | 0.0 |   |   |   |   | 0.0 | 0.0 |   |    | 0.0 | 0.0 | 0.0 |    | 0.0 | 0.0 |    | 0.0 | 0.0 | 0.0 |        |

| Position                     | % of total sequencing reads with A•T converted to G•C |     |   |   |   |   |   |     |   |    |     |     |     |    |     |     |    |     |     |     | Indel% |
|------------------------------|-------------------------------------------------------|-----|---|---|---|---|---|-----|---|----|-----|-----|-----|----|-----|-----|----|-----|-----|-----|--------|
|                              | 1                                                     | 2   | 3 | 4 | 5 | 6 | 7 | 8   | 9 | 10 | 11  | 12  | 13  | 14 | 15  | 16  | 17 | 18  | 19  | 20  |        |
| <b>EMX off-target site 3</b> | G                                                     | A   | G | G | C | C | G | A   | G | C  | A   | G   | A   | A  | G   | A   | A  | A   | G   | A   |        |
| ABEmax                       |                                                       | 0.0 |   |   |   |   |   | 0.0 |   |    | 0.0 | 0.0 | 0.0 |    | 0.0 | 0.0 |    | 0.0 | 0.0 | 0.0 |        |
| CP1012-ABEmax                |                                                       | 0.0 |   |   |   |   |   | 0.0 |   |    | 0.0 | 0.0 | 0.0 |    | 0.0 | 0.0 |    | 0.0 | 0.0 | 0.0 |        |
| CP1028-ABEmax                |                                                       | 0.0 |   |   |   |   |   | 0.1 |   |    | 0.1 | 0.1 | 0.0 |    | 0.0 | 0.0 |    | 0.0 | 0.0 | 0.0 |        |
| CP1041-ABEmax                |                                                       | 0.0 |   |   |   |   |   | 0.0 |   |    | 0.0 | 0.0 | 0.0 |    | 0.0 | 0.0 |    | 0.0 | 0.0 | 0.0 |        |
| CP1249-ABEmax                |                                                       | 0.0 |   |   |   |   |   | 0.1 |   |    | 0.1 | 0.0 | 0.0 |    | 0.0 | 0.0 |    | 0.0 | 0.0 | 0.0 |        |
| CP1300-ABEmax                |                                                       | 0.0 |   |   |   |   |   | 0.0 |   |    | 0.0 | 0.0 | 0.0 |    | 0.0 | 0.0 |    | 0.0 | 0.0 | 0.0 |        |



**Supplementary Table 7.** Activities of CP-ABEmax variants versus ABEmax at the HEK4 on-target and off-target sites previously characterized for *S. pyogenes* Cas9 nuclease

|                       |  | % of total sequencing reads with A•T converted to G•C |   |   |      |   |   |   |   |   |    |    |    |    |    |     |    |    |    |    |    |        |
|-----------------------|--|-------------------------------------------------------|---|---|------|---|---|---|---|---|----|----|----|----|----|-----|----|----|----|----|----|--------|
|                       |  | 1                                                     | 2 | 3 | 4    | 5 | 6 | 7 | 8 | 9 | 10 | 11 | 12 | 13 | 14 | 15  | 16 | 17 | 18 | 19 | 20 |        |
| <b>HEK4 on-target</b> |  | G                                                     | G | C | A    | C | T | G | C | G | G  | C  | T  | G  | G  | A   | G  | G  | T  | G  | G  | Indel% |
| ABEmax                |  |                                                       |   |   | 9.7  |   |   |   |   |   |    |    |    |    |    | 0.8 |    |    |    |    |    | 4.8    |
| CP1012-ABEmax         |  |                                                       |   |   | 2.5  |   |   |   |   |   |    |    |    |    |    | 1.0 |    |    |    |    |    | 1.5    |
| CP1028-ABEmax         |  |                                                       |   |   | 9.5  |   |   |   |   |   |    |    |    |    |    | 0.2 |    |    |    |    |    | 2.1    |
| CP1041-ABEmax         |  |                                                       |   |   | 40.3 |   |   |   |   |   |    |    |    |    |    | 1.8 |    |    |    |    |    | 1.3    |
| CP1249-ABEmax         |  |                                                       |   |   | 2.4  |   |   |   |   |   |    |    |    |    |    | 0.8 |    |    |    |    |    | 4.3    |
| CP1300-ABEmax         |  |                                                       |   |   | 0.9  |   |   |   |   |   |    |    |    |    |    | 0.8 |    |    |    |    |    | 1.0    |

|                               |  | % of total sequencing reads with A•T converted to G•C |   |   |     |   |   |   |   |   |    |    |    |    |    |     |    |    |     |    |    |        |
|-------------------------------|--|-------------------------------------------------------|---|---|-----|---|---|---|---|---|----|----|----|----|----|-----|----|----|-----|----|----|--------|
|                               |  | 1                                                     | 2 | 3 | 4   | 5 | 6 | 7 | 8 | 9 | 10 | 11 | 12 | 13 | 14 | 15  | 16 | 17 | 18  | 19 | 20 |        |
| <b>HEK4 off-target site 1</b> |  | T                                                     | G | C | A   | C | T | G | C | G | G  | C  | C  | G  | G  | A   | G  | G  | A   | G  | G  | Indel% |
| ABEmax                        |  |                                                       |   |   | 3.6 |   |   |   |   |   |    |    |    |    |    | 0.1 |    |    | 0.1 |    |    | 0.6    |
| CP1012-ABEmax                 |  |                                                       |   |   | 1.3 |   |   |   |   |   |    |    |    |    |    | 0.1 |    |    | 0.2 |    |    | 0.3    |
| CP1028-ABEmax                 |  |                                                       |   |   | 2.4 |   |   |   |   |   |    |    |    |    |    | 0.2 |    |    | 0.3 |    |    | 1.2    |
| CP1041-ABEmax                 |  |                                                       |   |   | 1.1 |   |   |   |   |   |    |    |    |    |    | 0.1 |    |    | 0.2 |    |    | 0.3    |
| CP1249-ABEmax                 |  |                                                       |   |   | 1.2 |   |   |   |   |   |    |    |    |    |    | 0.1 |    |    | 0.1 |    |    | 0.3    |
| CP1300-ABEmax                 |  |                                                       |   |   | 0.1 |   |   |   |   |   |    |    |    |    |    | 0.1 |    |    | 0.1 |    |    | 0.3    |

|                               |  | % of total sequencing reads with A•T converted to G•C |   |   |   |   |   |   |   |   |    |    |    |    |    |     |    |    |    |    |    |        |
|-------------------------------|--|-------------------------------------------------------|---|---|---|---|---|---|---|---|----|----|----|----|----|-----|----|----|----|----|----|--------|
|                               |  | 1                                                     | 2 | 3 | 4 | 5 | 6 | 7 | 8 | 9 | 10 | 11 | 12 | 13 | 14 | 15  | 16 | 17 | 18 | 19 | 20 |        |
| <b>HEK4 off-target site 2</b> |  | G                                                     | G | C | T | C | T | G | C | G | G  | C  | T  | G  | G  | A   | G  | G  | G  | G  | G  | Indel% |
| ABEmax                        |  |                                                       |   |   |   |   |   |   |   |   |    |    |    |    |    | 0.0 |    |    |    |    |    | 0.3    |
| CP1012-ABEmax                 |  |                                                       |   |   |   |   |   |   |   |   |    |    |    |    |    | 0.0 |    |    |    |    |    | 0.3    |
| CP1028-ABEmax                 |  |                                                       |   |   |   |   |   |   |   |   |    |    |    |    |    | 0.0 |    |    |    |    |    | 0.2    |
| CP1041-ABEmax                 |  |                                                       |   |   |   |   |   |   |   |   |    |    |    |    |    | 0.0 |    |    |    |    |    | 0.3    |
| CP1249-ABEmax                 |  |                                                       |   |   |   |   |   |   |   |   |    |    |    |    |    | 0.0 |    |    |    |    |    | 0.1    |
| CP1300-ABEmax                 |  |                                                       |   |   |   |   |   |   |   |   |    |    |    |    |    | 0.0 |    |    |    |    |    | 0.3    |

|                               |  | % of total sequencing reads with A•T converted to G•C |   |   |     |   |   |     |   |   |    |    |    |    |    |     |    |    |    |    |    |        |
|-------------------------------|--|-------------------------------------------------------|---|---|-----|---|---|-----|---|---|----|----|----|----|----|-----|----|----|----|----|----|--------|
|                               |  | 1                                                     | 2 | 3 | 4   | 5 | 6 | 7   | 8 | 9 | 10 | 11 | 12 | 13 | 14 | 15  | 16 | 17 | 18 | 19 | 20 |        |
| <b>HEK4 off-target site 3</b> |  | G                                                     | G | C | A   | C | G | A   | C | G | G  | C  | T  | G  | G  | A   | G  | G  | T  | G  | G  | Indel% |
| ABEmax                        |  |                                                       |   |   | 1.1 |   |   | 9.4 |   |   |    |    |    |    |    | 1.1 |    |    |    |    |    | 70.0   |
| CP1012-ABEmax                 |  |                                                       |   |   | 0.3 |   |   | 2.7 |   |   |    |    |    |    |    | 2.4 |    |    |    |    |    | 12.0   |
| CP1028-ABEmax                 |  |                                                       |   |   | 0.3 |   |   | 3.7 |   |   |    |    |    |    |    | 2.4 |    |    |    |    |    | 53.0   |
| CP1041-ABEmax                 |  |                                                       |   |   | 0.2 |   |   | 0.4 |   |   |    |    |    |    |    | 6.1 |    |    |    |    |    | 4.0    |
| CP1249-ABEmax                 |  |                                                       |   |   | 0.3 |   |   | 7.1 |   |   |    |    |    |    |    | 1.8 |    |    |    |    |    | 38.0   |
| CP1300-ABEmax                 |  |                                                       |   |   | 0.0 |   |   | 0.4 |   |   |    |    |    |    |    | 2.2 |    |    |    |    |    | 0.4    |

|                               |  | % of total sequencing reads with A•T converted to G•C |   |   |     |   |   |     |   |   |    |    |    |    |    |     |    |    |    |    |    |        |
|-------------------------------|--|-------------------------------------------------------|---|---|-----|---|---|-----|---|---|----|----|----|----|----|-----|----|----|----|----|----|--------|
|                               |  | 1                                                     | 2 | 3 | 4   | 5 | 6 | 7   | 8 | 9 | 10 | 11 | 12 | 13 | 14 | 15  | 16 | 17 | 18 | 19 | 20 |        |
| <b>HEK4 off-target site 4</b> |  | G                                                     | G | C | A   | C | G | A   | C | G | G  | C  | T  | G  | G  | A   | G  | G  | T  | G  | G  | Indel% |
| ABEmax                        |  |                                                       |   |   | 0.0 |   |   | 0.0 |   |   |    |    |    |    |    | 0.0 |    |    |    |    |    | 0.1    |
| CP1012-ABEmax                 |  |                                                       |   |   | 0.5 |   |   | 2.0 |   |   |    |    |    |    |    | 0.1 |    |    |    |    |    | 0.3    |
| CP1028-ABEmax                 |  |                                                       |   |   | 3.6 |   |   | 6.2 |   |   |    |    |    |    |    | 0.6 |    |    |    |    |    | 0.5    |
| CP1041-ABEmax                 |  |                                                       |   |   | 0.0 |   |   | 0.0 |   |   |    |    |    |    |    | 0.0 |    |    |    |    |    | 0.1    |
| CP1249-ABEmax                 |  |                                                       |   |   | 0.1 |   |   | 1.8 |   |   |    |    |    |    |    | 0.2 |    |    |    |    |    | 0.3    |
| CP1300-ABEmax                 |  |                                                       |   |   | 0.0 |   |   | 0.1 |   |   |    |    |    |    |    | 0.0 |    |    |    |    |    | 0.3    |

**Supplementary Table 8.** Protospacer sequences for 32 mammalian genomic sites

| <b>Site #</b> | <b>Protospacer</b>     | <b>PAM</b> |
|---------------|------------------------|------------|
| 1             | GGCAGAGAGCAGAACACTTT   | TGA        |
| 2             | GGGACAAGCAATGGGCTGGC   | TGA        |
| 3             | GTGGAACTCCTTGGGGGTAA   | TGA        |
| 4             | GATACAAGGACAGGCAGCAT   | AGA        |
| 5             | GTCTATTCTCTATCTTCATG   | AGA        |
| 6             | GCTCAAGCCTGATTCCAAGG   | AGA        |
| 7             | GCCGTACCCAAAGGTCCTC    | AGCG       |
| 8             | GGGGACTGAGCAGTAAACAA   | GGCG       |
| 9             | GATTTATGCAAACGGGTTGG   | GGCG       |
| 10            | GCGACAGGCCGAAGAGCTCAG  | CGCG       |
| 11            | GAAGGATGGAGAGGGCGGGG   | CGCG       |
| 12            | GAGAGAACCTGGCTAAGCAT   | TGCG       |
| 13            | GATCCAGGTGCTGCAGAAGG   | GAT        |
| 14            | GACAGGCAGGGGCACCGCGG   | CGCC       |
| 15            | GTGCCACCGGGGCGCCGCGG   | TGCC       |
| 16            | GTGGTAGACAGCATGTGTCCTA | AAGGGT     |
| 17            | ATTTACAGCCTGGCCTTTGGGG | TCGGGT     |
| 18            | GGAGAGAAAGAGAAGTTGATTG | ATGGGT     |
| 19            | GTGTCAGGTAATGTGCTAAACA | GAGAGT     |
| 20            | GCAGGGCACAGGGAAGAACCTC | TGGGAT     |
| 21            | GCTGTTGCATGAGGAAAGGGAC | TAGAGT     |
| 22            | GGCAGTCATCTTAGTCATTACC | TGAGGT     |
| 23            | CCAACATACATGCCCTTTGCC  | TCAAGT     |
| 24            | GGACTAGAGTAGGATTGTACCC | CTCAGT     |
| 25            | GTTAGACACGCACAGCATTTC  | GGAAGT     |
| 26            | GGCTGAGCTAACTGTGACAGCA | TGTGGT     |
| 27            | GGGAGCTCAAGCCTGATTCCAA | GGAGAT     |
| 28            | GACAAACCAGAAGCCGCTCC   | TGG        |
| 29            | GTTACACCCATGACGAACA    | TGG        |
| 30            | GAACACAAAGCATAGACTGC   | GGG        |
| 31            | GAGTCCGAGCAGAAGAAGAA   | GGG        |
| 32            | GAAGACCAAGGATAGACTGC   | TGG        |



**Supplementary Table 9. Primers used for mammalian cell genomic DNA amplification**

| <b>Primer Name</b> | <b>Sequence</b>                                           |
|--------------------|-----------------------------------------------------------|
| HTS_fwd_site1      | ACACTCTTTCCCTACACGACGCTCTCCGATCTNNNNACATGAGGGTGCCTGAGAAG  |
| HTS_rev_site1      | TGGAGTTCAGACGTGTGCTCTTCCGATCTGCAGGGCGCGTTGTAATTAG         |
| HTS_fwd_site2      | ACACTCTTTCCCTACACGACGCTCTCCGATCTNNNNCCAATGACTAGGGTGGGCAA  |
| HTS_rev_site2      | TGGAGTTCAGACGTGTGCTCTTCCGATCTGAGGAGAAGGCCAAGTGGTC         |
| HTS_fwd_site3      | ACACTCTTTCCCTACACGACGCTCTCCGATCTNNNNGAATATCAGGGGATGGCGCA  |
| HTS_rev_site3      | TGGAGTTCAGACGTGTGCTCTTCCGATCTTCCACACAGCCACAAGGATC         |
| HTS_fwd_site4      | ACACTCTTTCCCTACACGACGCTCTCCGATCTNNNNCCCTAAACCACCTGCAGAGG  |
| HTS_rev_site4      | TGGAGTTCAGACGTGTGCTCTTCCGATCTCAGCCCAGCCACATTCTAT          |
| HTS_fwd_site5      | TGGAGTTCAGACGTGTGCTCTTCCGATCTTCTCTTTCTCTCCCCACCC          |
| HTS_rev_site5      | ACACTCTTTCCCTACACGACGCTCTCCGATCTNNNNTCACTTCAGCCCAGGAGTAT  |
| HTS_fwd_site6      | ACACTCTTTCCCTACACGACGCTCTCCGATCTNNNNCGCGGGCTGAAGTAGATCAA  |
| HTS_rev_site6      | TGGAGTTCAGACGTGTGCTCTTCCGATCTCCTGTCTCTGCTCCTTTGTCCCC      |
| HTS_fwd_site7      | ACACTCTTTCCCTACACGACGCTCTTCCGATCTNNNNGAGGTTTCTGCCAGCTCTC  |
| HTS_rev_site7      | TGGAGTTCAGACGTGTGCTCTTCCGATCTGTCTGGCATCGAGTAGGCTG         |
| HTS_fwd_site8      | ACACTCTTTCCCTACACGACGCTCTTCCGATCTNNNNGATGCCCTCCATCTTCTCCG |
| HTS_rev_site8      | TGGAGTTCAGACGTGTGCTCTTCCGATCTAGGTTTGCATAGACCTGCC          |
| HTS_fwd_site9      | ACACTCTTTCCCTACACGACGCTCTTCCGATCTNNNNGGAGATAGCCCCTTGGGGT  |
| HTS_rev_site9      | TGGAGTTCAGACGTGTGCTCTTCCGATCTGTGGCAGAGCTACACGTTCT         |
| HTS_fwd_site10     | ACACTCTTTCCCTACACGACGCTCTTCCGATCTNNNNCTCTCCATCCTTCACGCAG  |
| HTS_rev_site10     | TGGAGTTCAGACGTGTGCTCTTCCGATCTCTTTGAGGGCGGAGGTTAGG         |
| HTS_fwd_site11     | ACACTCTTTCCCTACACGACGCTCTTCCGATCTNNNNATCCAAGCCTCAAGCCTGTC |
| HTS_rev_site11     | TGGAGTTCAGACGTGTGCTCTTCCGATCTCTTTGAGGGCGGAGGTTAGG         |
| HTS_fwd_site12     | ACACTCTTTCCCTACACGACGCTCTTCCGATCTNNNNGAACTCACAGAGCGGTGGAA |
| HTS_rev_site12     | TGGAGTTCAGACGTGTGCTCTTCCGATCTACAAATCCTGGCACCAGACC         |
| HTS_fwd_site13     | ACACTCTTTCCCTACACGACGCTCTTCCGATCTNNNNCATTGCAGAGAGGCGTATCA |
| HTS_rev_site13     | TGGAGTTCAGACGTGTGCTCTTCCGATCTGGGGTCCCAGGTGCTGAC           |
| HTS_fwd_site14     | ACACTCTTTCCCTACACGACGCTCTTCCGATCTNNNNGAACCAGGTAGCCAGAGAC  |
| HTS_rev_site14     | TGGAGTTCAGACGTGTGCTCTTCCGATCTTCTTTCAACCCGAACGGAG          |
| HTS_fwd_site15     | ACACTCTTTCCCTACACGACGCTCTTCCGATCTNNNNGAACCAGGTAGCCAGAGAC  |
| HTS_rev_site15     | TGGAGTTCAGACGTGTGCTCTTCCGATCTTCTTTCAACCCGAACGGAG          |
| HTS_fwd_site16     | ACACTCTTTCCCTACACGACGCTCTTCCGATCTNNNNTGCAGTCTCCTGCTTCTCTG |
| HTS_rev_site16     | TGGAGTTCAGACGTGTGCTCTTCCGATTGGTGGAGTGCTCTGTGTTTG          |
| HTS_fwd_site17     | ACACTCTTTCCCTACACGACGCTCTTCCGATCTNNNNGGACATTTCCACCGCAAATG |
| HTS_rev_site17     | TGGAGTTCAGACGTGTGCTCTTCCGATGCTACAGAAAGGTCAGCAGC           |
| HTS_fwd_site18     | ACACTCTTTCCCTACACGACGCTCTTCCGATCTNNNNTCACTTCAGCCCAGGAGTAT |
| HTS_rev_site18     | TGGAGTTCAGACGTGTGCTCTTCCGATCTTGTGTATGGTGAGAGGTAGGGA       |
| HTS_fwd_site19     | ACACTCTTTCCCTACACGACGCTCTTCCGATCTNNNNCTGCACCTAGCCTCCATGTC |

|                |                                                               |
|----------------|---------------------------------------------------------------|
| HTS_rev_site19 | TGGAGTTCAGACGTGTGCTCTTCCGATCTGCTGTGGCATCCAGAGACAT             |
| HTS_fwd_site20 | ACACTCTTCCCTACACGACGCTCTTCCGATCTNNNNCTGGGAATAGAGGGTAGTTTC     |
| HTS_rev_site20 | TGGAGTTCAGACGTGTGCTCTTCCGATCTCACTCTGCACAGCTGGAGAA             |
| HTS_fwd_site21 | ACACTCTTCCCTACACGACGCTCTTCCGATCTNNNNCCCTGTTCCCTAAAGCCCACC     |
| HTS_rev_site21 | TGGAGTTCAGACGTGTGCTCTTCCGATCTACTGGTTCTGTTTGTGGCCA             |
| HTS_fwd_site22 | ACACTCTTCCCTACACGACGCTCTTCCGATCTNNNNACGTCTCATATGCCCTTGG       |
| HTS_rev_site22 | TGGAGTTCAGACGTGTGCTCTTCCGATCTACGTAGGAATTTTGGTGGGACA           |
| HTS_fwd_site23 | ACACTCTTCCCTACACGACGCTCTTCCGATCTNNNNTGCAGTCTCCTGCTTCTCTG      |
| HTS_rev_site23 | TGGAGTTCAGACGTGTGCTCTTCCGATTGGTGGAGTGCTCTGTGTTTG              |
| HTS_fwd_site24 | ACACTCTTCCCTACACGACGCTCTTCCGATCTNNNNCCCTGTTCCCTAAAGCCCACC     |
| HTS_rev_site24 | TGGAGTTCAGACGTGTGCTCTTCCGATCTACTGGTTCTGTTTGTGGCCA             |
| HTS_fwd_site25 | ACACTCTTCCCTACACGACGCTCTTCCGATCTNNNNAGAGACTGATTGCGTGGAGT      |
| HTS_rev_site25 | TGGAGTTCAGACGTGTGCTCTTCCGATCTCACTCCAGCCTAGGCAACAA             |
| HTS_fwd_site26 | ACACTCTTCCCTACACGACGCTCTTCCGATCTNNNNCCAGCCCCATCTGTCAAACCT     |
| HTS_rev_site26 | TGGAGTTCAGACGTGTGCTCTTCCGATCTTGAATGGATTCTTGGAAACAATGA         |
| HTS_fwd_site27 | ACACTCTTCCCTACACGACGCTCTTCCGATCTNNNNCGCGGGCTGAAGTAGATCAA      |
| HTS_rev_site27 | TGGAGTTCAGACGTGTGCTCTTCCGATCTCCTGTCTCTGCTCCTTTGTCCCC          |
| HTS_fwd_site28 | ACACTCTTCCCTACACGACGCTCTTCCGATCTNNNNAGCCCTCTTTTTATTGGAACCTGTG |
| HTS_rev_site28 | TGGAGTTCAGACGTGTGCTCTTCCGATCTCCGACTGGTCCACTTACCTA             |
| HTS_fwd_site29 | ACACTCTTCCCTACACGACGCTCTTCCGATCTNNNNCTGACTCAGCCCTGCAAAGG      |
| HTS_rev_site29 | TGGAGTTCAGACGTGTGCTCTTCCGATCTCAAGTCAGGGGAGCGTGTC              |
| HTS_fwd_site30 | ACACTCTTCCCTACACGACGCTCTTCCGATCTNNNNCCAGCCCCATCTGTCAAACCT     |
| HTS_rev_site30 | TGGAGTTCAGACGTGTGCTCTTCCGATCTTGAATGGATTCTTGGAAACAATGA         |
| HTS_fwd_site31 | ACACTCTTCCCTACACGACGCTCTTCCGATCTNNNNCAGCTCAGCCTGAGTGTTGA      |
| HTS_rev_site31 | TGGAGTTCAGACGTGTGCTCTTCCGATCTCTCGTGGGTTTGTGGTTGC              |
| HTS_fwd_site32 | ACACTCTTCCCTACACGACGCTCTTCCGATCTNNNNTTGCTTATTGCTGAGGGGCA      |
| HTS_rev_site32 | TGGAGTTCAGACGTGTGCTCTTCCGATCTACCTCTCTCCTCCAGCTGAG             |

**Supplementary Sequences 1.** Amino acid sequences for each editor construct used in this study.

**VRQR-ABEmax**

MKRTADGSEFESPKKKRKRKRVSEVEFSHEYWMRHALTLAKRAWDEREVPVGAVLVHNN  
RVIGEGWNRPIGRHDPTAHAEIMALRQGGLVMQNYRLIDATLYVTLEPCVMCAGAMIH  
SRIGRVVFGARDAKTGAAGSLMDVLHHPGMNHRVEITEGILADECAALLSDFFRMRRQ  
EIKAQKKAQSSTDSSGGSSGGSSGSETPGTSESATPESSGGSSGGSSSEVEFSHEYWM  
RHALTLAKRARDEREVPVGAVLVLNNRVIGEGWNRAIGLHDPTAHAEIMALRQGGLVM  
QNYRLIDATLYVTFEPCVMCAGAMIHSRIGRVVFGVRNAKTGAAGSLMDVLHYPGMN  
HRVEITEGILADECAALLCYFFRMPRQVFNAQKKAQSSTDSSGGSSGGSSGSETPGTSE  
SATPESSGGSSGGSDKKYSIGLAIGTNSVGWAVITDEYKVPSSKFKVLGNTDRHSIKKN  
LIGALLFDSGETAEATRLKRTARRRYTRRKNRICYLQEIFSNEMAKVDDSSFFHRLEESFL  
VEEDKKHERHPIFGNIVDEVAYHEKYPTIYHLRKKLVDSTDKADLRLIYLALAHMIKFRG  
HFLIEGDLNPDNSDVKLFIQLVQTYNQLFEENPINASGVDKAILSARLSKSRLENLIA  
QLPGEKKNGLFGNLIASLGLTPNFKSNFDLAEDAKLQLSKDTYDDDLNLLAQIGDQY  
ADLFLAAKNLSDAILLSDILRVNTEITKAPLSASMIKRYDEHHQDLTLLKALVRQQLPEKY  
KEIFFDQSKNGYAGYIDGGASQEEFYKFIKPILEKMDGTEELLVKNLREDLLRKQRTFD  
NGSIPHQIHLGELHAILRRQEDFYFPLKDNREKIEKILTRIPYYVGPLARGNSRFAMWT  
RKSEETITPWNFEVVDKGAQAQSFIERMTNFDKNLPNEKVLPHSLLYEYFTVYNELT  
KVKYVTEGMRKPAFLSGEQKKAIVDLLFKTNRKVTVKQLKEDYFKKIECFDSVEISGVE  
DRFNASLGTYHDLLKIIKDKDFLDNEENEDILEDIVLTLTLFEDREMIEERLKTYAHLFDD  
KVMKQLKRRRYTGWGRLSRKLINGIRDKQSGKTILDFLKSDGFANRNFMQLIHDDSLT  
FKEDIQKAQVSGQGDLSLHEHIANLAGSPAIKKILQTVKVVDELVKVMGRHKPENIVIEM  
ARENQTTQKGQKNSRERMKRIEEGKELGSQILKEHPVENTQLQNEKLYLYYLQNGRD  
MYVDQELDINRLSDYVDHIVPQSFLKDDSIDNKVLTRSDKNRGKSDNPSEEVVKKM  
KNYWRQLLNAKLITQRKFDNLTKAERGGLSELDKAGFIKRQLVETRQITKHVAQILDSR  
MNTKYDENDKLIREVKVITLKSCLVSDFRKDFQFYKVVREINNYHHAHDAYLNAVVGTAI  
KKYPKLESEFVYGDYKVYDVRKMIKSEQEIGKATAKYFFYSNIMNFFKTEITLANGEIR  
KRPLIETNGETGEIVWDKGRDFATVRKVLSPQVNIVKKTEVQTGGFSKESILPKRNSD  
KLIARKKDWDPKKYGGFVSPTVAYSVLVAKVEKGGKSKLKSVKELLGITIMERSSSF  
NPIDFLEAKGYKEVKKDLIIKLPKYSLFELENGRKRMLASARELQKGNELALPSKYVNF  
YLASHYEKLGKSPEDNEQKQLFVEQHKHYLDEIIEQISEFSKRVILADANLDKVL SAYNK  
HRDKPIREQAENIIHLFTLTNLGAPAAFKYFDTTIDRKQYRSTKEVLDATLIHQSI  
GLYE TRIDLSQLGGDSGGSSKRTADGSEFEPKKKRKV

**xABEmax**

MKRTADGSEFESPKKKRKRKRVSEVEFSHEYWMRHALTLAKRAWDEREVPVGAVLVHNN  
RVIGEGWNRPIGRHDPTAHAEIMALRQGGLVMQNYRLIDATLYVTLEPCVMCAGAMIH  
SRIGRVVFGARDAKTGAAGSLMDVLHHPGMNHRVEITEGILADECAALLSDFFRMRRQ  
EIKAQKKAQSSTDSSGGSSGGSSGSETPGTSESATPESSGGSSGGSSSEVEFSHEYWM  
RHALTLAKRARDEREVPVGAVLVLNNRVIGEGWNRAIGLHDPTAHAEIMALRQGGLVM  
QNYRLIDATLYVTFEPCVMCAGAMIHSRIGRVVFGVRNAKTGAAGSLMDVLHYPGMN  
HRVEITEGILADECAALLCYFFRMPRQVFNAQKKAQSSTDSSGGSSGGSSGSETPGTSE  
SATPESSGGSSGGSDKKYSIGLAIGTNSVGWAVITDEYKVPSSKFKVLGNTDRHSIKKN  
LIGALLFDSGETAEATRLKRTARRRYTRRKNRICYLQEIFSNEMAKVDDSSFFHRLEESFL

VEEDKKHERHPIFGNIVDEVAYHEKYPTIYHLRKKLVDSTDKADLRLIYLALAHMIKFRG  
HFLIEGDLNPDNSDVKLFIQLVQTYNQLFEENPINASGVDAKAILSARLSKSRLENLIA  
QLPGEKKNGLFGNLIASLGLTPNFKSNFDLAEDTKLQLSKDQYDDDLNLLAQIGDQY  
ADLFLAAKNLSDAILLSDILRVNTEITKAPLSASMIKLYDEHHQDLTLLKALVRQQLPEKY  
KEIFFDQSKNGYAGYIDGGASQEEFYKFIKPILEKMDGTEELLVKNLREDLLRKQRTFD  
NGIIPHQIHLGELHAILRRQEDFYFPLKDNREKIEKILTFRIPYYVGPLARGNSRFAWMTR  
KSEETITPWNFEKVVDKGASAQSFIERMTNFDKNLPNEKVLPHKSLLEYFTVYNELTK  
VKYVTEGMRKPAFLSGDQKKAIVDLLFKTNRKVTVKQLKEDYFKKIECFDSVEISGVED  
RFNASLGTYHDLLKIIKDKDFLDNEENEDILEDIVLTLTLFEDREMIEERLKTYAHLFDDK  
VMKQLKRRRYTGWGRLSRKLINGIRDQKQSGKTILDFLKSDGFANRNFIQLIHDDSLTFK  
EDIQKAQVSGQGDSLHEHIANLAGSPAIKKILQTVKVVDELVKVMGRHHPENIVIEMA  
RENQTTQKGQKNSRERMKRIIEGKELGSQILKEHPVENTQLQNEKLYLYYLQNGRDM  
YVDQELDINRLSDYDHDHIVPQSFLKDDSIDNKVLTRSDKNRGSNDNPSEEVVKMMK  
NYWRQLLNAKLITQRKFDNLTKAERGGLSELDKAGFIKRLVETRQITKHVAQILD SRM  
NTKYDENDKLIREVKVITLKSCLVSDFRKDFQFYKREINNYHHAHDAYLNAVVG TALIK  
KYPKLESEFVYGDYKVYDVRKMIKSEQEIGKATAKYFFYSNIMNFFKTEITLANGEIRK  
RPLIETNGETGEIVWDKGRDFATVRKVL SMPQVNIVKKT EVQTGGFSKESILPKRNSDK  
LIARKKDWDPKKYGGFDSPTVAYSVLVAKVEKGKSKKLKSVKELLGITIMERS SFEKN  
PIDFLEAKGYKEVKKDLIILPKYSLFEENGRKRMLASAGVLQKGNELALPSKYVNF LY  
LASHYEKLGSPEDNEQKQLFVEQHKHYLDEIIEQISEFSKRVLADANLDKVL SAYNKH  
RDKPIREQAENIIHLFTLTNLGAPAAFKYFDTTIDRKRYTSTKEVL DATLIHQ SITGLYETR  
IDLSQLGGDSGGSKRTADGSEFEPKKKRKV

**VRER-ABEmax**

MKRTADGSEFESPKKKRKVSEVEFSHEYWMRHALTLAKRAWDEREVPVGAVLVHNN  
RVIGEGWNRPIGRHDPTAHAEIMALRQGGGLVMQNYRLIDATLYVTLEPCVMCAGAMIH  
SRIGRVVFGARDAKTGAAGSLMDVLHHPGMNHRVEITEGILADECAALLSDFFRMR RQ  
EIKAQKKAQSSTDSGGSSGGSSGSETPGTSESATPESSGGSSGGSSEVEFSHEYWM  
RHALTLAKRARDEREVPVGAVLVLNNRVIGEGWNRRAIGLHDPTAHAEIMALRQGGGLVM  
QNYRLIDATLYVTFEPCVMCAGAMIHSRIGRVVFGVRNAKTGAAGSLMDVLHYPGMN  
HRVEITEGILADECAALLCYFFRMPRQVFNAQKKAQSSTDSGGSSGGSSGSETPGTSE  
SATPESSGGSSGGSDKKYSIGLAIGTNSVGWAVITDEYKVPSKFKVLGNTDRHSIKKN  
LIGALLFDSGETAEATRLKRTARRRYTRRKNRICYLQEIFSNEMAKVDD SFFHRLEESFL  
VEEDKKHERHPIFGNIVDEVAYHEKYPTIYHLRKKLVDSTDKADLRLIYLALAHMIKFRG  
HFLIEGDLNPDNSDVKLFIQLVQTYNQLFEENPINASGVDAKAILSARLSKSRLENLIA  
QLPGEKKNGLFGNLIASLGLTPNFKSNFDLAEDA KLQLSKDQYDDDLNLLAQIGDQY  
ADLFLAAKNLSDAILLSDILRVNTEITKAPLSASMIKRYDEHHQDLTLLKALVRQQLPEKY  
KEIFFDQSKNGYAGYIDGGASQEEFYKFIKPILEKMDGTEELLVKNLREDLLRKQRTFD  
NGSIPHQIHLGELHAILRRQEDFYFPLKDNREKIEKILTFRIPYYVGPLARGNSRFAWMT  
RKSEETITPWNFEVVDKGASAQSFIERMTNFDKNLPNEKVLPHKSLLEYFTVYNELT  
KVYVTEGMRKPAFLSGEQKKAIVDLLFKTNRKVTVKQLKEDYFKKIECFDSVEISGVE  
DRFNASLGTYHDLLKIIKDKDFLDNEENEDILEDIVLTLTLFEDREMIEERLKTYAHLFDD  
KVMKQLKRRRYTGWGRLSRKLINGIRDQKQSGKTILDFLKSDGFANRNFMQLIHDDSLT  
FKEDIQKAQVSGQGDSLHEHIANLAGSPAIKKILQTVKVVDELVKVMGRHHPENIVIEM  
ARENQTTQKGQKNSRERMKRIIEGKELGSQILKEHPVENTQLQNEKLYLYYLQNGRD

MYVDQELDINRLSDYDVDHIVPQSFLKDDSIDNKVLTRSDKNRGKSDNVPSEEVVKKM  
KNYWRQLLNAKLITQRKFDNLTKAERGGLSELDKAGFIKRQLVETRQITKHVAQILDSR  
MNTKYDENDKLIREVKVITLKSCLVSDFRKDFQFYKREINNYHHAHDAYLNAVVGTAI  
KKYPKLESEFVYGDYKVYDVRKMIKSEQEIGKATAKYFFYSNIMNFFKTEITLANGEIR  
KRPLIETNGETGEIVWDKGRDFATVRKVLSPQVNIKKTEVQTGGFSKESILPKRNSD  
KLIARKKDWDPKKGFFVSPVAVSVLVAKVEKGGKSKKLSVKELLGITIMERSSSF  
NPIDFLEAKGYKEVKKDLIIKLPKYSLENGRKRMLASARELQKGNELALPSKYVNF  
YLASHYEKLGKSPEDNEQKQLFVEQHKHYLDEIIEQISEFSKRVILADANLDKVL  
SAYNKHRDKPIREQAENIIHLFTLTNLGAPAAFKYFDTTIDRKEYRSTKEVLDATLIHQ  
SITGLYETRIDLSQLGGDSGGSKRTADGSEFEPKKKRKV

### **SaABEmax**

MKRTADGSEFESPKKKRKVSEVEFSHEYWMRHALTLAKRAWDEREVPVGAVLVHNN  
RVIGEGWNRPIGRHDPTAHAEIMALRQGGGLVMQNYRLIDATLYVTLEPCVMCAGAM  
IHSRIGRVVFGARDAKTGAAGSLMDVLHHPGMNHRVEITEGILADECAALLSDFFRM  
RREQEIKAKKAQSSTDSSGGSSGGSSGSETPGTSESATPESSGGSSGGSSSEVEFS  
HEYWMRHALTLAKRARDEREVPVGAVLVLNNRVIGEGWNRRAIGLHDPTAHAEIMA  
LRQGGGLVMQNYRLIDATLYVTLEPCVMCAGAMIHSRIGRVVFGVRNAKTGAAGSL  
MDVLHYPGMNHRVEITEGILADECAALLCYFFRMPRQVFNAQKKAQSSTDSSGGSS  
GGSSGSETPGTSESATPESSGGSSGGSGKRNILGLAIGITSVGYGIIDYETRDVID  
AGVRLFKEANVENNEGRRSKRGARLKRHHRIQRVKKLLFDYNLLTDHSELSGINPY  
EARVKGLSQKLSEEFSAALLHLAKRRGVHNVNEVEEDTGNELSTKEQISRNSKALEE  
KYVAELQLERLKKDGEVRGSINRFKTSYVKEAKQLLKVKAYHQLDQSFIDTYIDLL  
ETRRTYYEGPGEGSPFGWKDIKEWYEMLMGHCTYFPEELRSVKYAYNADLYNALND  
LNNLVITRDENEKLEYEFQIIENVFKQKKKPTLKQIAKEILVNEEDIKGYRVTSTGK  
PEFTNLKVYHDIKDITARKEIENAELLDQIAKILTIYQSSEDIQEELTNLNSELTQEE  
IEQISNLKGYTGTHNLSLKAINLILD ELWHTNDNQIAIFNRLKLVPKKVDLSQQKE  
IPTTLVDDFILSPVVKRSFIQSIVINAIKKYGLPNDIIELAREKNSKDAQKMINEMQ  
KRNQRQTNERIEEIIRTTGKENAKYLIEKIKLHDMQEGKCLYSLEAIPLEDLLNPF  
NYEVDHIIIPRSVSFDNSFNKVLVKQEENSKKGNRTPFQYLSSSDSKISYETFKKH  
ILNLAAGKGRISKTKKEYLLEERDINRFSVQKDFINRNLVDTRYATRGLMNLRSY  
FRVNNLDVKVKSINGGFTSFLRRKWKFKKERNKGYKHAEDALIIANADFIFKEWKK  
LDKAKKVMENQMFEEKQAESMPEIETEQEYKEIFITPHQIKHIKDFKDYKYSHRV  
DKKPNRELINDTLYSTRKDDKGNTLIVNNLNGLYDKDNDKLLKLINKSPEKLLMY  
HHDPQTYQKLKLIMEQYGDEKNPLYKYEEETGNLYTKYSKKDNGPVIKKIKYYGN  
KLNALHDITDDYPNSRNKVVKLSLKPYPYFDVYLDNGVYKFTVKNLVDVIKENY  
YEVNSKCYEEAKKLLKISNQAEFIASFYNNDLIKINGELYRVIGVNNDLLNRIE  
VNMIDITYREYLENMNDKRPPRIIKTIASKTQSIKKYSTDILGNLYEVKSKKHPQ  
IIKKGGSGGSKRTADGSEFEPKKKRKV

### **SaKKH-ABEmax**

MKRTADGSEFESPKKKRKVSEVEFSHEYWMRHALTLAKRAWDEREVPVGAVLVHNN  
RVIGEGWNRPIGRHDPTAHAEIMALRQGGGLVMQNYRLIDATLYVTLEPCVMCAGAM  
IHSRIGRVVFGARDAKTGAAGSLMDVLHHPGMNHRVEITEGILADECAALLSDFFRM  
RREQEIKAKKAQSSTDSSGGSSGGSSGSETPGTSESATPESSGGSSGGSSSEVEFS  
HEYWMRHALTLAKRARDEREVPVGAVLVLNNRVIGEGWNRRAIGLHDPTAHAEIMA  
LRQGGGLVMQNYRLIDATLYVTLEPCVMCAGAMIHSRIGRVVFGVRNAKTGAAGSL  
MDVLHYPGMN

HRVEITEGILADECAALLCYFFRMPRQVFNAQKKAQSSTDSGGSSGGSSGSETPGTSE  
SATPESSGGSSGGSGKRNYILGLAIGITSVGYGIIDYETRDVIDAGVRLFKEANVENNEG  
RRSKRGARRLKRRRRHRIQRVKKLLFDYNLLTDHSELSGINPYEARVKGLSQKLSEEE  
FSAALLHLAKRRGVHNVNEVEEDTGNELSTKEQISRNSKALEEKYVAELQLERLKKDG  
EVRGSINRFKTSDYVKEAKQLLKVKAYHQLDQSFIDTYIDLLETRRRTYYEGPGEPSF  
GWKDIKEWYEMLMGHCTYFPEELRSVKYAYNADLYNALNDLNNLVITRDENEKLEYE  
KFQIIENVFKQKKKPTLKQIAKEILVNEEDIKGYRVTSTGKPEFTNLKVYHDIKDITARKEI  
ENAELLDQIAKILTIYQSSEDIQEELTNLNSELTQEEIEQISNLKGYTGTHNLSLKAINLILD  
ELWHTNDNQIAIFNRLKLVPKKVDLSQQKEIPTTLVDDFILSPVVKRSFIQSIKVINAIKKY  
GLPNDIIIELAREKNSKDAQKMINEMQKRNRQTNERIEEIIRTTGKENAKYLIEKIKLHDM  
QEGKCLYSLEAIPLEDLLNPFNYEVDHIIPRSVSFDNSFNKVLVKQEENSKKGNRTP  
FQYLSSSDSKISYETFKKHILNLAAGKGRISKTKKEYLLEERDINRFSVQKDFINRNLVDT  
RYATRGLMNLRSYFRVNNLDVKVKSINGGFTSFLRRKWKFKKERNKGYKHHHAEDALII  
ANADFIFKEWKLDKAKKVMENQMFEEKQAESMPEIETEQEYKEIFITPHQIKHIKDFKD  
YKYSHRVDKKNRKLINDTLYSTRKDDKGNTLIVNNLNGLYDKDNDKLLKLINKSPEKLL  
MYHHDPQTYQKLLIMEQYGDENPLYKYEEETGNLYTKYSKKDNGPVIKKIKYYGNK  
LNAHLDITDDYPNSRNKVKLSLKPFRFDVYLDNGVYKFVTVKNLDVIKKENYYEVNSK  
CYEEAKLKKISNQAEFIASFYKNDLIKINGELRVIGVNNDLLNRIEVNMIDITYREYLEN  
MNDKRPPHIIKTIASKTQSIKKYSTDILGNLYEVKSKKHPQIIKKGGGSKRTADGSEFEP  
KKKRKV

**CP1012-CBEmax**

MKRTADGSEFESPCKKRKVSSETGPVAVDPTLRRRIEPHEFEVFFDPRELKRETCCLY  
EINWGGRRHSIWRHTSQNTNKHVEVNFIEKFTTERYFCPNTRCSITWFLSWSPCGECSR  
AITEFLSRYPHVTLFIYIARLYHHADPRNRQGLRDLISSGVTIQIMTEQESGYCWRNFVN  
YSPSNEAHWPYPHLLWVRLYVLELYCIILGLPCLNILRRKQPQLTFFTIALQSCHYQRL  
PPHILWATGLKSGGSSGGSSGSETPGTSESATPESSGGSSGGSDYKVYDVRKMIAS  
EQEIGKATAKYFFYSNIMNFFKTEITLANGEIRKRPLIETNGETGEIVWDKGRDFATVRK  
VLSMPQVNIVKKTEVQTGGFSKESILPKRNSDKLIARKKDWDPKKYGGFDSPTVAYSV  
LVVAKVEKGKSKKLKSVKELLGITIMERSSEFEKNPIDFLEAKGYKEVKKDLIILPKYSLF  
ELENGRKRMLASAGELQKGNELALPSKYVNFLYLASHYEKLGKSPEDNEQKQLFVEQ  
HKHYLDEIIEQISEFSKRVLADANLDKVL SAYNKHARDKPIREQAENIIHLFTLTNLGAPAA  
FKYFDTTIDRKRYTSTKEVLDATLIHQ SITGLYETRIDLSQLGGDGGSSGGSSGGSSGG  
SGGSSGGDKKYSIGLAIGTNSVGWAVITDEYKVPSKFKVLGNTDRHSIKKNLIGALLFD  
SGETAEATRLKRTARRRYTRRKNRICYLQEIFSNEMAKVDDSFHRLVESFLVEEDKK  
HERHPIFGNIVDEVAYHEKYPTIYHLRKKLVDSTDKADLRLIYLALAHMIKFRGHFLIEGD  
LNPDNSDVKLFIQLVQTYNQLFEENPINASGVDAKAILSARLSKSRRLLENLIAQLPGEK  
KNGLFGNLIALSLGLTPNFKSNFDLAEDAKLQLSKD TYDDDLDNLLAQIGDQYADFLA  
AKNLSDAILSDILRVNTEITKAPLSASMIKRYDEHHQDLTLLKALVRQQLPKEYKEIFFD  
QSKNGYAGYIDGGASQEEFYKFIKPILEKMDGTEELLVKNLREDLLRKQRTFDNGSIPH  
QIHLGELHAILRRQEDFYPLKDNREKIEKILTFRIPIYYVGPLARGNSRFAMTRKSEET  
ITPWNFEVVDKGASQAQSFIERMTNFDKNLPNEKVLPHKSLLYEYFTVYNELTKVKYVT  
EGMRKPAFLSGEQKKAIVDLLFKTNRKVTVKQLKEDYFKKIECFDSVEISGVEDRFNAS  
LGTYHDLLKIIKDKDFLDNEENEDILEDIVLTLTLFEDREMIEERLKYAHLFDDKVMKQL  
KRRRYTGWGRLSRKLINGIRDKQSGKTILDFLKSDFANRNFMQLIHDDSLTFKEDIQK

AQVSGQGDSLHEHIANLAGSPAIKKGILQTVKVVDELVKVMGRHKPENIVIAMARENQT  
TQKGQKNSRERMKRIEELGKELGSQILKEHPVENTQLQNEKLYLYYLQNGRDMYVDQE  
LDINRLSDYDVDHIVPQSFLKDDSIDNKVLTRSDKNRGKSDNVPSEEVVKKMKNYWRQ  
LLNAKLITQRKFDNLTKAERGGLSELDKAGFIKRQLVETRQITKHVAQILDSRMNTKYDE  
NDKLIREVKVITLKSCLVSDFRKDFQFYKREINNYHHAHDAYLNAVVG TALIKKYPKLE  
SEFVYGGSGGSKRTADGSEFEPKKKRKV

**CP1028-CBEmax**

MKRTADGSEFESPKKKRQVSSETGPVAVDPTLRRRIEPHEFEVFFDPRELKRETCCLY  
EINWGGRHSIWRHTSQNTNKHVEVNFIEKFTTERYFCPNTRCSITWFLSWSPCGECSR  
AITEFLSRYPHVTLFIYIARLYHHADPRNRQGLRDLISSGVTIQIMTEQESGYCWRNFVN  
YSPSNEAHWPYPHLLWVRLYVLELYCIIILGLPPCLNILRRKQPQLTFFTIALQSCHYQRL  
PPHILWATGLKSGGSSGGSSGSETPGTSESATPESGGSSGGSEIGKATAKYFFYSNI  
MNFFKTEITLANGEIRKRPLIETNGETGEIVWDKGRDFATVRKVLSPQVNIVKTEVQ  
TGGFSKESILPKRNSDKLIARKKDWDPKKGFFDSPTVAYSVLVAKVEKKGSKKLKS  
VKELLGITIMERSSSFENPIDFLEAKGYKEVKKDLIIKLPKYSLFELENGRKRMLASAGEL  
QKGNELALPSKYVNFYLYLASHYEKLGSPEDNEQKQLFVEQHKKHYLDEIIEQISEFSKR  
VILADANLDKVL SAYNKHHRDKPIREQAENIIHLFTLTNLGAPAAFKYFDTTIDRKRYTSTK  
EVLDTLIHQSI TGLYETRIDLSQLGGDGGSGGSSGGSSGGSSGGSSGGSSGGMDKKYSIGL  
AIGTNSVGWAVITDEYKVPKFKVLGNTDRHSIKKNLIGALLFDSGETAEATRLKRTAR  
RRYTRRKNRICYLQEIFSNEMAKVDDSSFFHRLEESFLVEEDKKHERHPIFGNIVDEVAY  
HEKYPTIYHLRKKLVDSTDKADLRLIYLALAHMIKFRGHFLIEGDLNPDNSDVKLFIQLV  
QTYNQLFEENPINASGVDAKILSARLSKSRLENLIAQLPGEKKNLFGNLIASLGLT  
PNFKSNFDLAEDAKLQLSKD TYDDDLDNLLAQIGDQYADLFLAAKNLSDAILLSDILRVN  
TEITKAPLSASMIKRYDEHHQDLTLLKALVRQQLPEKYKEIFFDQSKNGYAGYIDGGAS  
QEEFYKFIKPILEKMDGTEELLVKLNREDLLRKQRTFDNGSIPHQIHLGELHAILRRQED  
FYPFLKDNREKIEKILTFRIPYYVGPLARGNSRFAWMTRKSEETITPWNFEEVVDK GAS  
AQSFIERMTNFDKNLPNEKVL PKHSLLEYFTVYNELTKVKYVTEGMRKPAFLS GEQK  
KAIVDLLFKTNRKVTVKQLKEDYFKKIECFDSVEISGVEDRFNASLGTYHDLLKIIKDKDF  
LDNEENEDILEDIVLTLTLFEDREMIEERLKYAHLFDDKVMKQLKRRRYTGWGRLSRK  
LINGIRDKQSGKTILDFLKS DGFANRNFMLIHDDSLTFKEDIQKAQVSGQGDSLHEHIA  
NLAGSPAIKKGILQTVKVVDELVKVMGRHKPENIVIAMARENQTTQKGQKNSRERMKRI  
EEGIKELGSQILKEHPVENTQLQNEKLYLYYLQNGRDMYVDQELDINRLSDYDVDHIVP  
QSFLKDDSIDNKVLTRSDKNRGKSDNVPSEEVVKKMKNYWRQLLNAKLITQRKFDNLTKA  
ERGGLSELDKAGFIKRQLVETRQITKHVAQILDSRMNTKYDENDKLIREVKVITLKS  
LVSDFRKDFQFYKREINNYHHAHDAYLNAVVG TALIKKYPKLESEFVYGDYKVYDVRK  
MIAKSEQSGGSKRTADGSEFEPKKKRKV

**CP1041-CBEmax**

MKRTADGSEFESPKKKRQVSSETGPVAVDPTLRRRIEPHEFEVFFDPRELKRETCCLY  
EINWGGRHSIWRHTSQNTNKHVEVNFIEKFTTERYFCPNTRCSITWFLSWSPCGECSR  
AITEFLSRYPHVTLFIYIARLYHHADPRNRQGLRDLISSGVTIQIMTEQESGYCWRNFVN  
YSPSNEAHWPYPHLLWVRLYVLELYCIIILGLPPCLNILRRKQPQLTFFTIALQSCHYQRL  
PPHILWATGLKSGGSSGGSSGSETPGTSESATPESGGSSGGSSNIMNFFKTEITLANG

EIRKRPLIETNGETGEIVWDKGRDFATVRKVL SMPQVNIVKKTEVQTGGFSKESILPKR  
NSDKLIARKKDWDPKKYGGFDSPTVAYSVLVAKVEKGKSKKLKSVKELLGITIMERS  
FEKNPIDFLEAKGYKEVKKDLIIKLPKYSLFELENGRKRMLASAGELQKGNELALPSKYV  
NFLYLASHYEKLGSPEDNEQKQLFVEQHKHYLDEIIIEQISEFSKRVLADANLDKVL  
SAYNKHRDKPIREQAENIIHLFTLTNLGAPAAFKYFDTTIDRKRYTSTKEVLDATLIHQ  
SITGLYETRIDLSQLGGDGGSGGSGGSGGSGGSGGSGGSGGDKKYSIGLAIGTNSV  
GWAVITDEYKVP SKKFKVLGNTDRHSIKKNLIGALLFDSGETAEATRLKRTARRRY  
TRRKNRICYLQEIFS NEMAKVDD SFFHRLEESFLVEEDKKHERHPIFGNIVDEVAY  
HEKYPTIYHLRKKLVDSTDKADLR LIYLALAHMIKFRGHFLIEGDLNPDNSDVKLFI  
QLVQTYNQLFEENPINASGVDAKAILSARLSKSRRENLI AQLPGEKKNGLFGNLI  
ALSLGLTPNFKSNFDLAEDAKLQLSKDTYDDDLDNLLAQIGDQYADLFLAAKNLSDA  
ILLSDILRVNTEITKAPLSASMIKRYDEHHQDLTLLKALVRQQLPEKYKEIFFDQSK  
NGYAGYIDGGASQEEFYKFIKPILEKMDGTEELLVKLNREDLLRKQRTFDNGSIPHQ  
IHGELHAILRRQEDFY PFLKDNREKIEKILTRIPYYVGPLARGNSRFAWMTRKSEE  
TITPWNFEEVVDKGASAQSFIERMTNFDKNLPNEKVL PKHSLLYEYFTVYNELTKV  
KYVTEGMRKPAFLSGEQKKAIVDLLFKTNRKVTVKQLKEDYFKKIECFDSVEISG  
VEDRFNASLGTYHDLLKIIKDKDFLDNEENEDILEDIVLTLTFEDREMIEERLKYA  
HLFDDKVMKQLKRRRYTGWGRLSRKLINGIRDKQSGKTILDFLKSDGFANRNFMQ  
LIHDDSLTFKEDIQKAQVSGQGDLSLHEHIANLAGSPAIKKGILQTVKVVDELVKV  
MGRHKPENIVIEMARENQTTQKGQKNSRERMKRIEEGIKELGSQILKEHPVENTQL  
QNEKLYLYYLQNGRDMYVDQELDINRLSDYDVDHIVPQSFLKDDSIDNKVLTRS  
DKNRGKSDNVPSEEVVKKMKNYWRQLLNAKLITQRKFDNLTKAERGGLSELDKAGFI  
K RQLVETRQITKHVAQILDSRMNTKYDENDKLIREVKVITLKS KLVSDFRKDFQFYK  
VREINNYHHAHDAYLNAVVG TALIKKYPKLESEFVYGDYKVYDVRKMIAKSEQEIG  
KATAKYFYSSGGSKRTADGSEFEPKKRKY

**CP1249-CBE<sub>max</sub>**

MKRTADGSEFESPKKKRKYVSSETGPVAVDPTLRRRIEPHEFEVFFDPREL  
RKETCLLYEINWGGRHSIWRHTSQNTNKHVEVNFIEKFTTERYFCPNTRCSITWFL  
SWSPCGECSR AITEFLSRYPHVTLFIYIARLYHHADPRNRQGLRDLISSGVTIQIMTE  
QESGYCWRNFVNYSPSNEAHWPYPHLLWVRLYVLELYCIILGLPCLNILRRKQPQLT  
FFTIALQSCHYQRLPPHILWATGLKSGGSSGGSSGSETPGTSESATPESSGGSSGG  
SPEDNEQKQLFVEQHKHYLDEIIIEQISEFSKRVLADANLDKVL SAYNKHRDKPI  
REQAENIIHLFTLTNLGAPAAFKYFDTTIDRKRYTSTKEVLDATLIHQ  
SITGLYETRIDLSQLGGDGGSGGSGGSGGSGGSGGSGGMDKKYSIGLAIGTNSV  
GWAVITDEYKVP SKKFKVLGNTDRHSIKKNLIGALLFDSGETAEATRLKRTARRRY  
TRRKNRICYLQEIFS NEMAKVDD SFFHRLEESFLVEEDKKHERHPIFGNIVDEVAY  
HEKYPTIYHLRKKLVDSTDKADLR LIYLALAHMIKFRGHFLIEGDLNPDNSDVKLFI  
QLVQTYNQLFEENPINASGVDAKAILSARLSKSRRENLI AQLPGEKKNGLFGNLI  
ALSLGLTPNFKSNFDLAEDAKLQLSKDTYDDDLDNLLAQIGDQYADLFLAAKNLSDA  
ILLSDILRVNTEITKAPLSASMIKRYDEHHQDLTLLKALVRQQLPEKYKEIFFDQSK  
NGYAGYIDGGASQEEFYKFIKPILEKMDGTEELLVKLNREDLLRKQRTFDNGSIPHQ  
IHGELHAILRRQEDFY PFLKDNREKIEKILTRIPYYVGPLARGNSRFAWMTRKSEE  
TITPWNFEEVVDKGASAQSFIERMTNFDKNLPNEKVL PKHSLLYEYFTVYNELTKV  
KYVTEGMRKPAFLSGEQKKAIVDLLFKTNRKVTVKQLKEDYFKKIECFDSVEISG  
VEDRFNASLGTYHDLLKIIKDKDFLDNEENEDILEDIVLTLTFEDREMIEERLKYA  
HLFDDKVMKQ



LKRRRYTGWGRLSRKLINGIRDKQSGKTILDFLKSDGFANRNFMQLIHDDSLTFKEDIQ  
KAQVSGQGDSLHEHIANLAGSPAIKKGILQTVKVDELVKVMGRHKPENIVEMARENQ  
TTQKGQKNSRERMKRIEEGIKELGSQILKEHPVENTQLQNEKLYLYYLQNGRDMYVDQ  
ELDINRLSDYDVDHIVPQSFLKDDSIDNKVLTRSDKNRGKSDNVPSEEVVKMKNYWR  
QLLNAKLITQRKFDNLTKAERGGLSELDKAGFIKRQLVETRQITKHVAQILDSRMNTKYD  
ENDKLIREVKVITLKSCLVSDFRKDFQFYKREINNYHHAHDAYLNAVVG TALIKKYPKL  
ESEFVYGDYKVYDVRKMIKSEQEIGKATAKYFFYSNIMNFFKTEITLANGEIRKRPLIET  
NGETGEIVWDKGRDFATVRKVL SMPQVNIVKKTEVQTGGFSKESILPKRNSDKLIARKK  
DWDPK KYGGFDSPTVAYSVLVAKVEK GKSKKLSVKELLGITIMERS SFEKNPIDFLE  
AKGYKEVKKDLIIKLPKYSLFELENGRKRMLASAGELQKGNELALPSKYVNFLYLASHY  
EKLGSSGGSKRTADGSEFEPKKKRKV

**CP1300-CBE<sub>max</sub>**

MKRTADGSEFESPKKKRQVSSSETGPVAVDPTLRRRIEPHEFEVFFDPRELKRETCCLLY  
EINWGGRHSIWRHTSQNTNKHVEVNFIEKFTTERYFCPNTRCSITWFLSWSPCGECSR  
AITEFLSRYPHVTLFIYIARLYHHADPRNRQGLRDLISSGVTIQIMTEQESGYCWRNFVN  
YSPSNEAHWPYPHLLWVRLYVLELYCII LGLPPCLNLRKQPQLTFFTIALQSCHYQRL  
PPHILWATGLKSGGSSGGSSGSETPGTSESATPES SGGSSGGSKPIREQAENIIHLFTL  
TNLGAPAAFKYFDTTIDRKRYTSTKEVLDATLIHQ SITGLYETRIDLSQLGGDGGSSGS  
GGSSGGSSGGSSGGDKKYSIGLAIGTNSVGWAVITDEYKVPSKKFKVLGNTDRHSIKK  
NLIGALLFDSGETAEATRLKRTARRRYTRRKNRICYLQEIFS NEMAKVDDSFHRLEES  
FLVEEDKKHERHPIFGNIVDEVAYHEKYPTIYHLRKKLVDSTDKADLR LIYLALAHMIKFR  
GHFLIEGDLNPDNSDVKLFIQLVQTYNQLFEENPINASGVDAKAILSARLSKSRRENL  
IAQLPGEKKNGLFGNLIASLGLTPNFKSNFDLAEDAKLQLSKD TYDDDLDNLLAQIGDQ  
YADLFLAAKNLSDAILLSDILRVNTEITKAPLSASMIKRYDEHHQDLTLLKALVRQQLPEK  
YKEIFFDQSKNGYAGYIDGGASQEEFYKFIKPILEKMDGTEELLV KLNREDLLRKQRTF  
DNGSIPHQIHLGELHAILRRQEDFY PFLKDNREKIEKILTFRIPYVVGPLARGNSRFAWM  
TRKSEETITPWNFEEVVDKGASAQSFIERMTNFDKNLPNEKVL PKHSLLYEYFTVYNEL  
TKVKYVTEGMRKPAFLSGEQKKAIVDLLFKTNRKVTVKQLKEDYFKKIECFDSVEISGV  
EDRFNASLGTYHDLLKIIKDKDFLDNEENEDILEDIVLTLTLFEDREMIEERLKYAHLFD  
DKVMKQLKRRRYTGWGRLSRKLINGIRDKQSGKTILDFLKSDGFANRNF MQLIHDDSL  
TFKEDIQKAQVSGQGDSLHEHIANLAGSPAIKKGILQTVKVDELVKVMGRHKPENIVIE  
MARENQTTQKGQKNSRERMKRIEEGIKELGSQILKEHPVENTQLQNEKLYLYYLQNGR  
DMYVDQELDINRLSDYDVDHIVPQSFLKDDSIDNKVLTRSDKNRGKSDNVPSEEVVKK  
MKNYWRQLLNAKLITQRKFDNLTKAERGGLSELDKAGFIKRQLVETRQITKHVAQILDS  
RMNTKYDENDKLIREVKVITLKSCLVSDFRKDFQFYKREINNYHHAHDAYLNAVVGTA  
LIKKYPKLESEFVYGDYKVYDVRKMIKSEQEIGKATAKYFFYSNIMNFFKTEITLANGEI  
RKRPLIETNGETGEIVWDKGRDFATVRKVL SMPQVNIVKKTEVQTGGFSKESILPKRNS  
DKLIARKKDWDPK KYGGFDSPTVAYSVLVAKVEK GKSKKLSVKELLGITIMERS SFE  
KNPIDFLEAKGYKEVKKDLIIKLPKYSLFELENGRKRMLASAGELQKGNELALPSKYVNFL  
YLASHYEKLGSPEDNEQKQLFVEQHKHYLDEIIEQISEFSKRVILADANLDKVL SAYN  
KHRDSGGSKRTADGSEFEPKKKRKV

**CP1012-ABE<sub>max</sub>**



DNEQKQLFVEQHKHYLDEIIEQISEFSKRVLADANLDKVL SAYNKHRDKPIREQAENIIH  
LFTLTNLGAPAAFKYFDTTIDRKRYTSTKEVLDATLIHQ SITGLYETRIDLSQLGGDGGG  
GGSGGSGGSGGSGGSGGMDKKYSIGLAIGTNSVGWAVITDEYKVPSKKFKVLGNTDR  
HSIKKNLIGALLFDSGETAEATRLKRTARRRYTRRKNRICYLQEIFS NEMAKVDDSFHR  
LEESFLVEEDKKHERHPIFGNIVDEVAYHEKYPTIYHLRKKLVDSTDKADLR LIYLALAH  
MIKFRGHFLIEGDLNPDNSDVKLFIQLVQTYNQLFEENPINASGVDAKAILSARLSKSR  
RLENLIAQLPGEKKNGLFGNLIASLGLTPNFKSNFDLAEDA KLQLSKD TYDDDLDNLLA  
QIGDQYADLFLAAKNLSDAILLSDILRVNTEITKAPLSASMIKRYDEHHQDLTLLKALVRQ  
QLPEKYKEIFFDQSKNGYAGYIDGGASQEEFYKFIKPILEKMDGTEELLV KLNREDLLRK  
QRTFDNGSIPHQIHLGELHAILRRQEDFY PFLKDNREKIEKILTFRIPYYVGPLARGNSRF  
AWMTRKSEETITPWNFEEVVDKGASAQSFIERMTNFDKNLPNEKVLPKHSLLYEYFTV  
YNELTKVKYVTEGMRKPAFLSGEQKKAIVDLLFKTNRKVTVKQLKEDYFKKIECFDSVEI  
SGVEDRFNASLGTYHDLKIIKDKDFLDNEENEDILEDIVLTLTLFEDREMIEERLKYAH  
LFDDKVMKQLKRRRYTGWGRLSRKLINGIRDKQSGKTILDFLKSDGFANRNF MQLIHD  
DSLTFKEDIQKAQVSGQGDSLHEHIANLAGSPAIKKGILQTVKVVDELVKVMGRHKPEN  
IVIEMARENQTTQKGQKNSRERMKRIEEGIKELGSQILKEHPVENTQLQNEKLYLYLQ  
NGRDMYVDQELDINRLSDYVDHIVPQSFLKDDSIDNKVLTRSDKNRGKSDNVPSEEV  
VKKMKNYWRQLLNAKLITQRKFDNLTKAERGGLELKDAGFIKRQLVETRQITKHVAQI  
LDSRMNTKYDENDKLIREVKVITLKS KLVSDFRKDFQFYK VREINNYHHAHDAYLNAV  
GTALIKKYPKLESEFVYGDYKVYDVRKMIKSEQSGGSKRTADGSEFEPKKKRKV

**CP1041-ABEmax**

MKRTADGSEFESP KKKR KVSEVEFSHEYWMRHALTLAKRAWDEREVPVGAVLVHNN  
RVIGEGWNRPIGRHDPTAHAEIMALRQGG LVMQNYRLIDATLYVTLEPCVMCAGAMIH  
SRIGRVVFGARDAKTGAAGSLMDVLHHPGMNHRVEITEGILADECAALLSDFFRMRRQ  
EIKAKKAQSSTDSSGSSGGSSGSETPGTSESATPESSGGSSGGSSEVEFSHEYWM  
RHALTLAKRARDEREVPVGAVLVLNNRVIGEGWNRAIGLHDPTAHAEIMALRQGG LVM  
QNYRLIDATLYVTFEPCVMCAGAMIHSRIGRVVFGVRNAKTGAAGSLMDVLHYPGMN  
HRVEITEGILADECAALLCYFFRMPRQVFNAQKKAQSSTDSSGSSGGSSGSETPGTSE  
SATPESSGGSSGGSNIMNFFKTEITLANGEIRKRPLIETNGETGEIVWDKGRDFATVRK  
VLSMPQVNIVKKTEVQTGGFSKESILPKRNSDKLIARKKDWDPKKYGGFDSPTVAYSV  
LVVAKVEKGKSKKLKSVKELLGITIMERS SFEKNPIDFLEAKGYKEVKDLI IKLPKYSLF  
ELENGRKRMLASAGELQKGNELALPSKYVNFLYLASHYEKLGSPEDNEQKQLFVEQ  
HKHYLDEIIEQISEFSKRVLADANLDKVL SAYNKHRDKPIREQAENIIHLFTLTNLGAPAA  
FKYFDTTIDRKRYTSTKEVLDATLIHQ SITGLYETRIDLSQLGGDGGSGGSGGSGGSGG  
SGGSGGDKKYSIGLAIGTNSVGWAVITDEYKVPSKKFKVLGNTDRHSIKKNLIGALLFD  
SGETAETRLKRTARRRYTRRKNRICYLQEIFS NEMAKVDDSFHRLEESFLVEEDKK  
HERHPIFGNIVDEVAYHEKYPTIYHLRKKLVDSTDKADLR LIYLALAHMIKFRGHFLIEG  
LNPDNSDVKLFIQLVQTYNQLFEENPINASGVDAKAILSARLSKSRLENLIAQLPGEK  
KNGLFGNLIASLGLTPNFKSNFDLAEDA KLQLSKD TYDDDLDNLLAQIGDQYADLFLA  
AKNLSDAILLSDILRVNTEITKAPLSASMIKRYDEHHQDLTLLKALVRQQLPEKYKEIFFD  
QSKNGYAGYIDGGASQEEFYKFIKPILEKMDGTEELLV KLNREDLLRKQRTFDNGSIPH  
QIHLGELHAILRRQEDFY PFLKDNREKIEKILTFRIPYYVGPLARGNSRF AWMTRKSEET  
ITPWNFEEVVDKGASAQSFIERMTNFDKNLPNEKVLPKHSLLYEYFTVYNELTKVKYVT

EGMRKPAFLSGEQKKAIVDLLFKTNRKVTVKQLKEDYFKKIECFDSVEISGVEDRFNAS  
LGTYHDLLKIIKDKDFLDNEENEDILEDIVLTLTLFEDREMIEERLKYAHLFDDKVMKQL  
KRRRYTGWGRLSRKLINGIRDKQSGKTILDFLKSDGFANRNFQMQLIHDDSLTFKEDIQK  
AQVSGQGDSLHEHIANLAGSPAIAKKGILQTVKVVDELVKVMGRHKPENIVIAMARENQT  
TQKGQKNSRERMKRIIEGKELGSQILKEHPVENTQLQNEKLYLYYLQNGRDMYVDQE  
LDINRLSDYDVDHIVPQSFLKDDSIDNKVLTRSDKNRGKSDNVPSEEVVKMKMKNYWRQ  
LLNAKLITQRKFDNLTKAERGGELSELDKAGFIKRQLVETRQITKHVAQILDSRMNTKYDE  
NDKLIREVKVITLKSCLVSDFRKDFQFYKVVREINNYHHAHDAYLNAVVG TALIKKYPKLE  
SEFVYGDYKVYDVRKMIKSEQEIGKATAKYFFYSSGGSKRTADGSEFEPKKRKY

**CP1249-ABEmax**

MKRTADGSEFESPKKKRKYSEVEFSHEYWMRHALTLAKRAWDEREVPVGAVLVHNN  
RVIGEGWNRPIGRHDPTAHAEIMALRQGGGLVMQNYRLIDATLYVTLEPCVMCAGAMIH  
SRIGRVVFGARDAKTGAAGSLMDVLHHPGMNHRVEITEGILADECAALLSDFFRMRQ  
EIKAKKAQSSTDSSGSSGSSGSETPGTSESATPESSGGSSGSSSEVEFSHEYWM  
RHALTLAKRARDEREVPVGAVLVLNRRVIGEGWNRRAIGLHDPTAHAEIMALRQGGGLVM  
QNYRLIDATLYVTFEPCVMCAGAMIHSRIGRVVFGVRNAKTGAAGSLMDVLHYPGMN  
HRVEITEGILADECAALLCYFFRMPRQVFNAQKKAQSSTDSSGSSGSSGSETPGTSE  
SATPESSGGSSGSSPEDNEQKQLFVEQHKHYLDEIIEQISEFSKRVLADANLDKVLSA  
YKHRDKPIREQAENIIHLFTLTNLGAPAAFKYFDTTIDRKRYTSTKEVLDATLIHQSTGL  
YETRIDLSQLGGDGGSSGSSGSSGSSGSSGSSGSSGMDKKYSIGLAIGTNSVGWAVITDE  
YKVPSKKFKVLGNTDRHSIKKNLIGALLFDSGETAEATRLKRTARRRYTRRKNRICYLQ  
EIFSNEMAKVDDSFHRLEESFLVEEDKKHERHPIFGNIVDEVAYHEKYPTIYHLRKKLV  
DSTDKADRLIYLALAHMIKFRGHFLIEGDLNPDNSDVKLFIQLVQTYNQLFEENPINA  
SGVDAKAILSARLSKSRLENLIAQLPGEKKNLFGNLIASLGLTPNFKSNFDLAEDAK  
LQLSKDQYDDDLNLLAQIGDQYADLFLAAKNLSDAILLSDILRVNTEITKAPLSASMIKR  
YDEHHQDLTLLKALVRQQLPEKYKEIFFDQSKNGYAGYIDGGASQEEFYKFIKPILEKM  
DGTEELLVKNLREDLLRKQRTFDNGSIPHQIHLGELHAILRRQEDFYFPLKDNREKIEKIL  
TFRIPYVYVGPLARGNSRFAMTRKSEETITPWNFEVVDKGGASQSFIERMTNFDKNL  
PNEKVLPHSLLYEYFTVYNELTKVKYVTEGMRKPAFLSGEQKKAIVDLLFKTNRKVTV  
KQLKEDYFKKIECFDSVEISGVEDRFNASLGTYHDLLKIIKDKDFLDNEENEDILEDIVLTL  
TLFEDREMIEERLKYAHLFDDKVMKQLKRRRYTGWGRLSRKLINGIRDKQSGKTILDF  
LKSDGFANRNFQMQLIHDDSLTFKEDIQKAQVSGQGDSLHEHIANLAGSPAIAKKGILQTV  
KVVDELVKVMGRHKPENIVIAMARENQTTQKGQKNSRERMKRIIEGKELGSQILKEHP  
VENTQLQNEKLYLYYLQNGRDMYVDQELDINRLSDYDVDHIVPQSFLKDDSIDNKVLTR  
SDKNRGKSDNVPSEEVVKMKMKNYWRQLLNAKLITQRKFDNLTKAERGGELSELDKAGFI  
KRQLVETRQITKHVAQILDSRMNTKYDENDKLIREVKVITLKSCLVSDFRKDFQFYKVVRE  
INNYHHAHDAYLNAVVG TALIKKYPKLESEFVYGDYKVYDVRKMIKSEQEIGKATAKY  
FFYSNIMNFFKTEITLANGEIRKRPLIETNGETGEIVWDKGRDFATVRKVLVSMQVNIK  
KTEVQTGGFSKESILPKRNSDKLIARKKDWDPKKGFFSPTVAVSVLVVAKVEKGGKS  
KKLKSVELLGITIMERSSFEKNPIDFLEAKGYKEVKKDLIIPKYSLELENGRKRMLA  
SAGELQKGNELALPSKYVNFLYLASHYEKLGSSGGSKRTADGSEFEPKKRKY



**Supplementary Note 1.** Representative batch file input with parameters for Crispresso2 HTS analysis

HTS analysis was performed using the batch function from Crispresso2<sup>39</sup>. Batch analysis was prepared using the following representative parameters. The parameters are as follows:

| Parameter                                       | Property                                                                                 |
|-------------------------------------------------|------------------------------------------------------------------------------------------|
| <i>fastq_r1</i>                                 | .fastq file generated from miseq output                                                  |
| <i>a</i>                                        | amplicon sequence of genomic site                                                        |
| <i>g</i>                                        | protospacer sequence without PAM                                                         |
| <i>n</i>                                        | name of Crispresso2 output file                                                          |
| <i>min_frequency_alleles_around_cut_to_plot</i> | minimum % for an outcome to be included in the allelic frequencies output figure         |
| <i>w</i>                                        | width of window around predicted cut site (3-nt 5' from start of PAM) for indel analysis |
| <i>q</i>                                        | minimum average quality score (phred33) required to include a read for analysis          |

| <i>fastq_r1</i>     | <i>a</i> | <i>g</i>             | <i>n</i>    | <i>min_frequency_alleles_around_cut_to_plot</i> | <i>w</i> | <i>q</i> |
|---------------------|----------|----------------------|-------------|-------------------------------------------------|----------|----------|
| TPH-210-unt-n1_S173 | CCGACTG  | GACAAACCAGAAGCCGCTCC | TPH-210-unt | 0.05                                            | 10       | 30       |
| TPH-210-unt-n2_S180 | CCGACTG  | GACAAACCAGAAGCCGCTCC | TPH-210-unt | 0.05                                            | 10       | 30       |
| TPH-ABE1012-210-n1  | CCGACTG  | GACAAACCAGAAGCCGCTCC | TPH-ABE10   | 0.05                                            | 10       | 30       |
| TPH-ABE1012-210-n2  | CCGACTG  | GACAAACCAGAAGCCGCTCC | TPH-ABE10   | 0.05                                            | 10       | 30       |
| TPH-ABE1028-210-n1  | CCGACTG  | GACAAACCAGAAGCCGCTCC | TPH-ABE10   | 0.05                                            | 10       | 30       |
| TPH-ABE1028-210-n2  | CCGACTG  | GACAAACCAGAAGCCGCTCC | TPH-ABE10   | 0.05                                            | 10       | 30       |
| TPH-ABE1041-210-n1  | CCGACTG  | GACAAACCAGAAGCCGCTCC | TPH-ABE10   | 0.05                                            | 10       | 30       |
| TPH-ABE1041-210-n2  | CCGACTG  | GACAAACCAGAAGCCGCTCC | TPH-ABE10   | 0.05                                            | 10       | 30       |
| TPH-ABE1249-210-n1  | CCGACTG  | GACAAACCAGAAGCCGCTCC | TPH-ABE12   | 0.05                                            | 10       | 30       |
| TPH-ABE1249-210-n2  | CCGACTG  | GACAAACCAGAAGCCGCTCC | TPH-ABE12   | 0.05                                            | 10       | 30       |
| TPH-ABE1300-210-n1  | CCGACTG  | GACAAACCAGAAGCCGCTCC | TPH-ABE12   | 0.05                                            | 10       | 30       |
| TPH-ABE1300-210-n2  | CCGACTG  | GACAAACCAGAAGCCGCTCC | TPH-ABE12   | 0.05                                            | 10       | 30       |
| TPH-ABEMAX-210-n1   | CCGACTG  | GACAAACCAGAAGCCGCTCC | TPH-ABEMA   | 0.05                                            | 10       | 30       |
| TPH-ABEMAX-210-n2   | CCGACTG  | GACAAACCAGAAGCCGCTCC | TPH-ABEMA   | 0.05                                            | 10       | 30       |
| TPH-CBE1012-210-n1  | CCGACTG  | GACAAACCAGAAGCCGCTCC | TPH-CBE10   | 0.05                                            | 10       | 30       |
| TPH-CBE1012-210-n2  | CCGACTG  | GACAAACCAGAAGCCGCTCC | TPH-CBE10   | 0.05                                            | 10       | 30       |
| TPH-CBE1028-210-n1  | CCGACTG  | GACAAACCAGAAGCCGCTCC | TPH-CBE10   | 0.05                                            | 10       | 30       |
| TPH-CBE1028-210-n2  | CCGACTG  | GACAAACCAGAAGCCGCTCC | TPH-CBE10   | 0.05                                            | 10       | 30       |
| TPH-CBE1041-210-n1  | CCGACTG  | GACAAACCAGAAGCCGCTCC | TPH-CBE10   | 0.05                                            | 10       | 30       |
| TPH-CBE1041-210-n2  | CCGACTG  | GACAAACCAGAAGCCGCTCC | TPH-CBE10   | 0.05                                            | 10       | 30       |
| TPH-CBE1249-210-n1  | CCGACTG  | GACAAACCAGAAGCCGCTCC | TPH-CBE12   | 0.05                                            | 10       | 30       |
| TPH-CBE1249-210-n2  | CCGACTG  | GACAAACCAGAAGCCGCTCC | TPH-CBE12   | 0.05                                            | 10       | 30       |
| TPH-CBE1300-210-n1  | CCGACTG  | GACAAACCAGAAGCCGCTCC | TPH-CBE12   | 0.05                                            | 10       | 30       |
| TPH-CBE1300-210-n2  | CCGACTG  | GACAAACCAGAAGCCGCTCC | TPH-CBE12   | 0.05                                            | 10       | 30       |
| TPH-CBEMAX-210-n1   | CCGACTG  | GACAAACCAGAAGCCGCTCC | TPH-CBEMA   | 0.05                                            | 10       | 30       |
| TPH-CBEMAX-210-n2   | CCGACTG  | GACAAACCAGAAGCCGCTCC | TPH-CBEMA   | 0.05                                            | 10       | 30       |
